# Supplementary material for: Engineered interfaces in indium-hafnium oxide catalysts unlock superior methanol productivity
Source: Research Square preprint supplement (doi:10.21203/rs.3.rs-7472244/v1), 2025-09-09
Supplement: Supplementary file 1 [file ecc66bea8bab9e565855e993.pdf]

## Supplementary Information

### **Engineered interfaces in indium-hafnium oxide catalysts unlock superior methanol productivity**

*Yung-Tai Chiang,<sup>a,b</sup> Milica Ritopecki,<sup>c,d</sup> Patrik O. Willi,<sup>a,b</sup> Katja Raue,<sup>b,e</sup> Jordi Morales-Vidal,<sup>c</sup> Tangsheng Zou,<sup>a,b</sup> Mikhail Agrachev,<sup>b,e</sup> Henrik Eliasson,<sup>f</sup> Jianyang Wang,<sup>a,b</sup> Rolf Erni,<sup>f</sup> Wendelin J. Stark,<sup>a,b</sup> Gunnar Jeschke,<sup>b,e</sup> Robert N. Grass,<sup>a,b</sup> Núria López,<sup>c</sup> Sharon Mitchell,<sup>a,b</sup> and Javier Pérez-Ramírez<sup>a,b,\*</sup>*

<sup>a</sup> Institute for Chemical and Bioengineering, Department of Chemistry and Applied Biosciences, ETH Zurich, Vladimir-Prelog-Weg 1, 8093 Zurich, Switzerland.

<sup>b</sup> NCCR Catalysis, Zurich, Switzerland.

<sup>c</sup> Institute of Chemical Research of Catalonia (ICIQ-CERCA), The Barcelona Institute of Science and Technology, Av. Països Catalans 16, 43007 Tarragona, Spain.

<sup>d</sup> Universitat Rovira i Virgili, Av. Catalunya 35, Tarragona 43002, Spain.

<sup>e</sup> Institute of Molecular Physical Science, Department of Chemistry and Applied Biosciences, ETH Zurich, Vladimir-Prelog-Weg 1, 8093 Zurich, Switzerland.

<sup>f</sup> Electron Microscopy Center, Empa - Swiss Federal Laboratories for Materials Science and Technology, Uberlandstrasse 129, 8600 Dubendorf, Switzerland.

\* Corresponding author: [jpr@chem.ethz.ch](mailto:jpr@chem.ethz.ch)

## **Table of Contents**

|                            |    |
|----------------------------|----|
| Supplementary Notes 1-4    | 3  |
| Supplementary Tables 1-12  | 13 |
| Supplementary Figures 1-47 | 20 |
| Supplementary References   | 51 |

### Supplementary Note 1: DFT modelling approach for In-Hf mixed oxides.

**Selection of HfO<sub>2</sub> polymorph.** At ambient pressure, HfO<sub>2</sub> can adopt three crystalline polymorphs; monoclinic (m), tetragonal (t), and cubic (c), which interconvert with temperature. m-HfO<sub>2</sub> is thermodynamically stable at room temperature and transforms into t-HfO<sub>2</sub> and then to c-HfO<sub>2</sub> upon heating. The monoclinic-to-tetragonal and tetragonal-to-cubic transitions occur at ~2000 K and ~2870 K, respectively, and c-HfO<sub>2</sub> melts at 3031 K. Alternatively, for ZrO<sub>2</sub>, The monoclinic-to-tetragonal and tetragonal-to-cubic transitions occur at ~1480 K and ~2650 K, respectively, which are significantly lower than the transition temperature of HfO<sub>2</sub><sup>1</sup>.

XRD analysis of bulk phases shows that, depending on the preparation method and In<sub>2</sub>O<sub>3</sub> content, indium-hafnium mixed oxide catalysts may contain either only m-HfO<sub>2</sub>, or a mixture of monoclinic, tetragonal, and cubic polymorphs. Surface-sensitive Raman spectroscopy indicates mainly m-HfO<sub>2</sub>, except at high In<sub>2</sub>O<sub>3</sub> content, where features shift toward c-HfO<sub>2</sub>. Considering that the best-performing catalysts exhibited predominantly or exclusively the monoclinic polymorph, we focused on this phase. However, we also simulated structures based on t/c-HfO<sub>2</sub> for comparison.

**Substitution of indium single atoms in the bulk of HfO<sub>2</sub>.** The crystal symmetry and coordination of HfO<sub>2</sub> polymorphs are characterized as follows:

m-HfO<sub>2</sub> ( $P2_1/c$ ):  $a \neq b \neq c$ ;  $\alpha = \gamma = 90^\circ \neq \beta$ . Hf atoms are 7-fold coordinated, whereas O can have 3- or 4-fold coordination.

t-HfO<sub>2</sub> ( $P4_2/nmc$ ):  $a = b \neq c$ ;  $\alpha = \beta = \gamma = 90^\circ$ . Two distinct Hf–O bond lengths. Hf atoms are 8-fold coordinated, and O atoms are 4-fold coordinated.

c-HfO<sub>2</sub> ( $Fm\bar{3}m$ ):  $a = b = c$ ;  $\alpha = \beta = \gamma = 90^\circ$ . Hf–O bond distances are equivalent throughout, with the same coordination as t-HfO<sub>2</sub>.

Supercells (2×2×2 for monoclinic and cubic, 2×2×3 for tetragonal) were constructed to match experimental indium contents for 2 wt% In<sub>2</sub>O<sub>3</sub>, which showed the best performance.

Since each polymorph contains only a single type of metal cation, lattice substitution of indium was examined by replacing a Hf atom with an In atom (**Supplementary Fig. 6**) and was found to be energetically favourable in the monoclinic lattice.

Oxygen vacancy formation was studied for the pristine and In-containing bulk models. For m-HfO<sub>2</sub>, vacancies were introduced at both 3-fold and 4-fold coordinated O sites, whereas only one symmetry unique O site exists in t-HfO<sub>2</sub> and c-HfO<sub>2</sub>. For In-containing systems, all non-equivalent O atoms in the first coordination sphere were assessed (seven for m-HfO<sub>2</sub>, two for t-HfO<sub>2</sub>, and one for c-HfO<sub>2</sub>). The results (**Supplementary Fig. 6**) show that the presence of oxygen vacancies makes the stabilization of lattice-substituted indium atoms more favourable within the bulk, particularly in the cubic polymorph, and that oxygen vacancy formation is favoured when indium atoms are present.

**Analysis of In speciation.** AC-STEM images confirm the atomic dispersion of InO<sub>x</sub> species, likely as indium single atoms. Since isolated indium sites have rarely been explored within the active ensembles of In<sub>2</sub>O<sub>3</sub>-based catalysts for CO<sub>2</sub> hydrogenation, density functional theory (DFT) simulations were performed on indium species adsorbed to the surface of the HfO<sub>2</sub> support in ligand-free or oxyhydroxylated form. The formation of neighbouring oxygen vacancies was also studied in each case. Thermodynamics of reaction paths were calculated for CO<sub>2</sub> hydrogenation to methanol and the competing reverse water-gas shift (RWGS) reaction.

**Stabilization of isolated In sites at the surface and subsurface of HfO<sub>2</sub>.** To evaluate the stabilization of In single atoms by HfO<sub>2</sub>, we constructed slab models by cleaving the optimized bulk lattices of the monoclinic and tetragonal phases (**Supplementary Fig. 11**). The most stable oxygen-terminated surfaces were selected: ( $\bar{1}11$ ) for m-HfO<sub>2</sub> and (101) for t-HfO<sub>2</sub>, respectively. The slabs were constructed with  $p(1\times1)$  and  $p(1\times2)$  surface unit cells, respectively, with an identical number of layers, formula units, and ratio of relaxed-to-fixed atoms<sup>2</sup>.

Three types of In single-atom species were assessed. Substitution models involved replacing a surface or subsurface Hf atom with an In atom. Adsorption models considered the



deposition of an isolated In atom on top of the surface oxygen atoms. Finally, hydroxylated adsorption models involved the deposition of  $\text{In}(\text{OH})_3$  species on the same surface, in which case surface unit cells twice the size of those mentioned were used to prevent the interaction between adsorbed species.

Each configuration was studied in the presence and absence of a neighbouring oxygen vacancy. In the substitution model for m- $\text{HfO}_2$  ( $-111$ ), the slab contains eight non-equivalent Hf sites: five bulk-like 7-fold coordination (four subsurface, one surface) and three 6-fold-coordinated surface atoms (**Supplementary Fig. 12**). In t- $\text{MO}_2$  (101), the slab contains four Hf atoms in each of the surface and subsurface layers; the surface Hf atoms are 7-fold coordinated, while the subsurface atoms are 8-fold coordinated, as in the bulk. Non-equivalency arises from distinct M–O bond lengths. Substitution of In atoms is generally more favourable at surface and subsurface sites than in the bulk of the support (**Supplementary Fig. 14**), and lower incorporation energies are observed for the monoclinic than the tetragonal phase. The adsorption of isolated In atoms is endothermic, leading to physisorption. In contrast, the adsorption of  $\text{In}(\text{OH})_3$  adatoms is consistently exothermic, with oxygen atoms acting as anchoring sites on both monoclinic and tetragonal  $\text{HfO}_2$  surfaces (**Supplementary Fig. 18**).

Oxygen vacancy formation was examined for pristine (m-/t-) $\text{HfO}_2$  slabs, for lattice-substituted In single atoms, and for adsorbed  $\text{In}(\text{OH})_3$  species, which are detailed in **Supplementary Figs. 13, 15, and 19**, respectively. For the pristine systems, vacancy formation was simulated at all non-equivalent oxygens. In m- $\text{HfO}_2(-111)$ , 16 non-equivalent oxygen sites were identified (8 subsurface, 8 surface), mainly 3- or 4-fold coordinated, with one 2-fold coordinated surface site. In t- $\text{MO}_2(101)$ , eight non-equivalent oxygens were found (four subsurface, four surface), with each layer containing two 3-fold and two 4-fold (bulk-like) coordinated oxygens. Substituting a single Hf atom with In (**Supplementary Fig. 12**) and testing each non-equivalent O site revealed that oxygen vacancies stabilize surface In incorporation, particularly in the tetragonal polymorph (**Supplementary Fig. 15**). In addition

to the lattice O sites, in  $\text{In}(\text{OH})_3\text{-HfO}_2$  systems, three potential vacant sites from hydroxyl groups were examined. The most favourable oxygen vacancy is located directly above (on top) the adsorbed In atom (**Fig. 3, Supplementary Fig. 19**).

**Energetics and stability of the  $\text{InHfO}_x$  models.** The relative stability of pristine m-, t-, and c- $\text{HfO}_2$  polymorphs was evaluated by calculating their formation energies ( $E_f$ ), as defined in **Supplementary Equations 1 and 2**. Reference energies were taken from DFT simulations by formula unit of each  $\text{HfO}_2$  polymorph ( $E_{\text{HfO}_2, \text{bulk}}^{\text{DFT}}$ ), bulk hafnium ( $E_{\text{Hf, bulk}}^{\text{DFT}}$ ), and molecular oxygen ( $E_{\text{O}_2, \text{gas}}^{\text{DFT}}$ ):

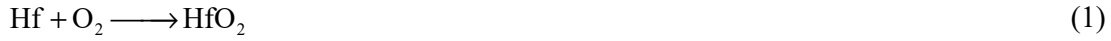

$$E_f = E_{\text{HfO}_2, \text{bulk}}^{\text{DFT}} - E_{\text{Hf, bulk}}^{\text{DFT}} - E_{\text{O}_2, \text{bulk}}^{\text{DFT}} \quad (2)$$

The potential energy ( $E$ ) of the bulk and slab  $\text{HfO}_2$  systems was then determined (**Supplementary Equations 3 and 4**) to assess the relative stability of models with oxygen vacancies and or incorporated In atoms. The reference energies for these calculations were molecular  $\text{H}_2$  ( $E_{\text{H}_2, \text{gas}}^{\text{DFT}}$ ),  $\text{H}_2\text{O}$  ( $E_{\text{H}_2\text{O}, \text{gas}}^{\text{DFT}}$ ), bulk In metal ( $E_{\text{In, bulk}}^{\text{DFT}}$ ), and pristine bulk supercell or slab ( $\text{Hf}_x\text{O}_y$ ) of each polymorph. Here,  $\nu$  denotes the number of oxygen vacancies and  $s$  the number of incorporated In atoms:

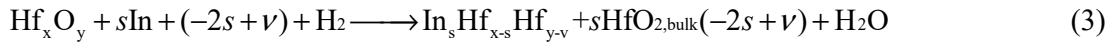

$$E = E_{\text{In}_s\text{Hf}_{x-s}\text{O}_{y-\nu}}^{\text{DFT}} + sE_{\text{HfO}_2, \text{bulk}}^{\text{DFT}} + (-2s + \nu)E_{\text{H}_2\text{O}, \text{gas}}^{\text{DFT}} - sE_{\text{Hf, bulk}}^{\text{DFT}} - sE_{\text{O}_2, \text{bulk}}^{\text{DFT}} - (-2s + \nu)E_{\text{H}_2, \text{gas}}^{\text{DFT}} \quad (4)$$

The oxygen vacancy formation energy ( $E_{\text{vac}}$ ) was obtained using **Supplementary Equation 5** to identify the most stable vacancy site and assess the likelihood of vacancy formation:

$$E_{\text{vac}} = E_{\text{In}_s\text{M}_{x-s}\text{O}_{y-\nu+1}}^{\text{DFT}} + E_{\text{H}_2\text{O}, \text{gas}}^{\text{DFT}} - E_{\text{In}_s\text{M}_{x-s}\text{O}_{y-\nu}}^{\text{DFT}} - E_{\text{H}_2, \text{gas}}^{\text{DFT}} \quad (5)$$

The segregation energy ( $E_{\text{seg}}$ ) of each polymorph was calculated to quantify the tendency of In atoms to migrate from bulk to subsurface or surface sites (**Supplementary Equation 6**):

$$E_{\text{seg}} = E_{\text{In@subsurface/surface}} + E_{\text{In@bulk}} \quad (6)$$

Finally, the aggregation energy indicates the tendency of  $\text{In}(\text{OH})_3$  species to form dimers on the surface (**Supplementary Equation 7**):

$$E_{\text{agg}} = 2E_{\text{In}(\text{OH})_3@\text{surface}} - E_{2(\text{In}(\text{OH})_3)@\text{surface}} - E_{\text{surface}} \quad (7)$$

**Simulation of In-Zr mixed oxides.** Since atomically dispersed In atoms have not previously been modelled as active sites in  $\text{CO}_2$  hydrogenation to methanol, for comparison, an identical set of simulations was conducted for  $\text{ZrO}_2$  by replacing Hf with Zr<sup>3,4</sup>.  $\text{ZrO}_2$  undergoes the same polymorphic sequence as  $\text{HfO}_2$ , but the m-t transition occurs at lower temperature (~1480 K) and the t-c transition at ~2650 K. XRD analyses indicate the bulk crystalline phase consists either of m- $\text{ZrO}_2$ , or a mixture of m- and t- $\text{ZrO}_2$ . A small fraction of t- $\text{ZrO}_2$  is also detectable at the surface, but it decreases during  $\text{CO}_2$  hydrogenation.

## **Supplementary Note 2: Electronic structure and oxygen vacancy dynamics.**

Oxygen vacancy density is a key descriptor in  $\text{In}_2\text{O}_3$ -based catalysts for  $\text{CO}_2$  hydrogenation to methanol<sup>5,6</sup>, and depends on the synthesis methods and history of thermal or chemical treatments of the catalyst. For binary catalytic systems prepared by flame spray pyrolysis, formation of intrinsic defects is favoured owing to the rapid quenching rate and presence of heterovalent dopants. Fundamentally, oxygen vacancy generation is associated with the removal of (sub)surface lattice oxygen, releasing two electrons that may be trapped at the vacancy site and adjacent  $\text{M}^{4+}$  ion ( $\text{M} = \text{Hf}, \text{Zr}$ ). This process traps a single electron in the oxygen vacancy ( $\text{V}_\text{O}^\bullet$ ,  $g_{\text{iso}} = 2.004$ ) and forms an  $\text{M}^{3+}$  ion ( $g_{\text{xx}} = g_{\text{yy}} = 1.98$ ,  $g_{\text{zz}} = 1.96$ ). While both signals are observed in the EPR profile of fresh  $2\text{InZrO}_x$ , only the former is recorded in fresh  $2\text{InHfO}_x$  catalyst (**Fig. 5b, Supplementary Figs. 30-31**). This difference points to distinct electronic structures of the vacancy and neighbouring  $\text{M}^{4+}$  ion. Formation of the  $\text{V}_\text{O}^\bullet\text{-M}^{3+}$

structure is thermodynamically preferred in m-ZrO<sub>2</sub>, whereas the vacancy with two electrons (V<sub>O</sub><sup>••</sup>-M<sup>4+</sup>) is more stable in m-HfO<sub>2</sub>. Still, the presence of a V<sub>O</sub><sup>•</sup> signal in 2InHfO<sub>x</sub> indicates that some electrons are trapped at isolated defective sites. Under controlled operating conditions (He, H<sub>2</sub>, CO<sub>2</sub>, and CO<sub>2</sub>+H<sub>2</sub>), the V<sub>O</sub><sup>•</sup> signal in 2InHfO<sub>x</sub> remains virtually unchanged, indicating that it is likely a spectator species. In contrast, V<sub>O</sub><sup>••</sup> is likely the more relevant fingerprint for active sites, though it remains silent in electron paramagnetic resonance (EPR) since the vacancy contains paired electrons.

For 2InZrO<sub>x</sub>, thermal treatment in He reoxidises Zr<sup>3+</sup> to Zr<sup>4+</sup>, attributed to the transfer of trapped electrons from M sites to thermally-induced oxygen vacancies<sup>5,6</sup>. Exposure to CO<sub>2</sub> heals the isolated oxygen vacancies, leaving only stable superoxides (O<sup>2-</sup>,  $g_{zz} = 2.035$ ,  $g_{yy} = 2.01$ ,  $g_{xx} = 2.002$ ) on the surface. Upon H<sub>2</sub> treatment, additional vacant sites form via reduction, and the released lattice oxygens combine with surface electrons to yield superoxide species. Finally, introducing the reaction mixture (CO<sub>2</sub> + H<sub>2</sub>) removes the superoxide signal and increases the oxygen vacancy density, as evidenced by the higher V<sub>O</sub><sup>•</sup> signal and a more intense ferromagnetic signal (V<sub>O</sub>-f, ~5 G) from strongly coupled oxygen vacancies.

### **Supplementary Note 3: DFT simulation of reaction thermodynamics.**

We computed the thermodynamics of reaction paths for CO<sub>2</sub> hydrogenation to methanol via the formate pathway, along with the competitive RWGS path yielding CO (**Fig. 6a**, **Supplementary Figs. 38-40**). Simulations were performed on m-HfO<sub>2</sub>, m-ZrO<sub>2</sub>, and t-ZrO<sub>2</sub>, as the experimentally observed surfaces. In each case, we considered adsorbed In(OH)<sub>3</sub> species with one oxygen vacancy on top of the adsorbed In atom, as the most representative models of the 2InHfO<sub>x</sub> and 2InZrO<sub>x</sub> catalysts (see **Supplementary Note 1**).

On m-InHfO<sub>x</sub> and m-InZrO<sub>x</sub>, CO<sub>2</sub> adsorption occurs via carbonate formation; one oxygen atom of CO<sub>2</sub> binds to the adsorbed In atom, while the carbon bonds to an oxygen from a hydroxide ligand. On t-InZrO<sub>x</sub>, in contrast, CO<sub>2</sub> binds at a lattice oxygen site adjacent to the

indium atom. H<sub>2</sub> activation proceeds heterolytically, generating an In–H/OH pair on the surface. In the methanol pathway, the hydride from In–H is transferred to the carbon of the adsorbed CO<sub>2</sub> species, producing formate (CHO<sub>2</sub>). A second heterolytic H<sub>2</sub> splitting precedes two additional hydrogenation steps: a hydride transfer to the carbon forming CH<sub>2</sub>O<sub>2</sub>, followed by proton transfer to the oxygen, yielding formic acid (CH<sub>2</sub>OOH). Dehydration of CH<sub>2</sub>OOH produces CH<sub>2</sub>O and H<sub>2</sub>O. A third heterolytic H<sub>2</sub> activation and hydride/proton transfers lead to methoxy (CH<sub>3</sub>O) formation and finally methanol. In the RWGS route, the initial intermediate is carboxylate (COOH) rather than formate. Its dehydration yields CO and H<sub>2</sub>O.

#### **Supplementary Note 4: Kinetic modelling and performance predictions.**

**Notation.** A microkinetic model developed previously<sup>6-8</sup> was adapted and fitted to experimental data for CO<sub>2</sub> hydrogenation over the 2InHfO<sub>x</sub> and 2InZrO<sub>x</sub> catalysts. Experimental conditions varied across  $T$ ,  $P$ ,  $GHSV$ , and H<sub>2</sub>/CO<sub>2</sub> ratio. Over 100 catalytic tests were conducted to obtain a robust dataset for kinetic model fitting. The full experimental data is available through the Zenodo repository (doi:10.5281/zenodo.16881810).

Two reaction pathways were considered consistent with mechanistic insights: Methanol formation from CO<sub>2</sub> (denoted subscript ‘MeOH’) and CO formation through the reverse water-gas shift reaction (denoted subscript ‘RWGS’). Surface reactions were modelled using a two-site Langmuir-Hinshelwood-Hougen-Watson (LHHW) mechanism. The following notations are used:

|               |                                                                |
|---------------|----------------------------------------------------------------|
| $p_i$         | partial pressure of compound $i$                               |
| $r_n$         | reaction rate of elementary step $n$                           |
| $k_n, k_{-n}$ | forward and backward rate coefficients for elementary step $n$ |
| $\theta_i$    | surface coverage of compound $i$                               |

$$K_i = \frac{k_{\text{ads},i}}{k_{\text{des},i}} = \frac{\theta_i}{p_i} \quad \text{adsorption equilibrium for compound } i$$

$\theta_*$  fraction of free adsorption sites for CO<sub>2</sub>, CO, HCOO, CH<sub>3</sub>O, CH<sub>3</sub>OH

$\theta_{\#}$  fraction of free adsorption sites for H and H<sub>2</sub>O

**Rate expressions.** In the two-site model, gaseous CO<sub>2</sub>, CO, and CH<sub>3</sub>OH competitively adsorb on site \*, where carbon-containing intermediates such as formate (HCOO), methoxy (CH<sub>3</sub>O) also adsorb. Meanwhile H<sub>2</sub>O adsorption and dissociative H<sub>2</sub> adsorption occur on site #. The elementary steps considered for MeOH formation are:

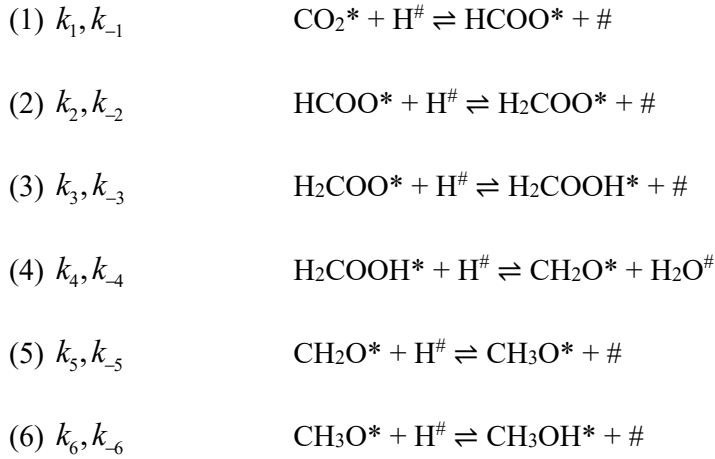

For CO formation via RWGS, the elementary steps considered are:

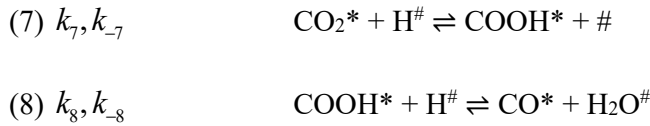

The rate-determining steps are assumed as follows: For MeOH formation, the combination of steps (4) and (5) leads to the rate expressions shown in **Equations 8 and 9**:

$$r_{\text{MeOH}} = k_4 k_5 \theta_{\text{H}_2\text{COOH}} \theta_{\text{H}}^2 - k_{-4} k_{-5} \theta_{\text{CH}_3\text{O}} \theta_{\text{H}_2\text{O}} \theta_{\#} \quad (8)$$

$$= k_A \frac{\theta_{\#}^2 \theta_{*}}{\sqrt{p_{\text{H}_2}}} \left( p_{\text{CO}_2} p_{\text{H}_2}^3 - \frac{p_{\text{CH}_3\text{OH}} p_{\text{H}_2\text{O}}}{K_{\text{eq,MeOH}}} \right) \quad (9)$$

where  $k_A$  denotes the reaction rate coefficient for methanol formation. For CO formation, step (8) is rate-determining resulting in the rate expressions given in **Equations 10 and 11**:

$$r_{\text{RWGS}} = k_8 \theta_{\text{COOH}} \theta_{\text{H}} - k_{-8} \theta_{\text{H}_2\text{O}} \theta_{\text{CO}} \quad (10)$$

$$= k_B \theta_{\#} \theta_{*} \left( p_{\text{CO}_2} p_{\text{H}_2} - \frac{p_{\text{H}_2\text{O}} p_{\text{CO}}}{K_{\text{eq,RWGS}}} \right) \quad (11)$$

where  $k_B$  denotes the reaction rate coefficient for CO formation.

**Site balance and free site fraction.** In addition to adsorbed  $\text{CO}_2$ ,  $\text{CO}$ , and  $\text{CH}_3\text{OH}$ , operando DRIFTS experiments (**Fig. 6b,c, Extended Fig. 6, Supplementary Figs. 42-43**) confirmed the presence of formate ( $\text{HCOO}$ ) and methoxy ( $\text{CH}_3\text{O}$ ) intermediates, which are included explicitly in the site balance. The free adsorption site fractions on sites  $*$  and  $\#$  are given by the site balance **Equations 12 and 13**:

$$\theta_{*} = \left( 1 + K_{\text{CO}_2} p_{\text{CO}_2} + K_{\text{CO}} p_{\text{CO}} + K_{\text{CH}_3\text{OH}} p_{\text{CH}_3\text{OH}} + K_1 K_{\text{CO}_2} p_{\text{CO}_2} \sqrt{K_{\text{H}_2} p_{\text{H}_2}} + \frac{K_6 K_{\text{CH}_3\text{OH}} p_{\text{CH}_3\text{OH}}}{\sqrt{K_{\text{H}_2} p_{\text{H}_2}}} \right)^{-1} \quad (12)$$

$$\theta_{\#} = \frac{1}{1 + \sqrt{K_{\text{H}_2} p_{\text{H}_2}} + K_{\text{H}_2\text{O}} p_{\text{H}_2\text{O}}} \quad (13)$$

**Temperature dependence of rate constants.** Overall rate constants for both reactions follow Arrhenius behaviour, referenced to  $T_{\text{ref}} = 573 \text{ K}$ , as shown in **Equations 14 and 15**:

$$k_{\text{MeOH}}(T) = k_{\text{MeOH}} \exp \left( \frac{E_{\text{a,MeOH}}}{R} \left( \frac{1}{T_{\text{ref}}} - \frac{1}{T} \right) \right) \quad (14)$$

$$k_{\text{RWGS}}(T) = k_{\text{RWGS}} \exp \left( \frac{E_{\text{a,RWGS}}}{R} \left( \frac{1}{T_{\text{ref}}} - \frac{1}{T} \right) \right) \quad (15)$$

where  $E_{a,\text{MeOH}}$  and  $E_{a,\text{RWGS}}$  are the respective activation energies,  $R = 8.314 \times 10^{-3} \text{ kJ mol}^{-1} \text{ K}^{-1}$ , and  $k_{\text{MeOH}}$  or  $k_{\text{RWGS}}$  are the pre-exponential factors. Detailed derivations of these expressions are available in our previous work<sup>6</sup>.

**Parameter fitting.** Predicted molar flows,  $F_{i,\text{predicted}}$ , for species  $i$  were calculated by numerically integrating the relevant plug flow reactor (PFR) design equations using the experimental conditions ( $T$ ,  $P$ , and inlet flow rates,  $F_{i,\text{inlet}}$ , derived from the  $\text{H}_2:\text{CO}$  feed ratio and  $GHSV$ ). The fitting minimized the objective function defined in **Equation 16**, representing the normalized sum of squared differences between predicted and experimental outlet molar flows of  $\text{CH}_3\text{OH}$  and  $\text{CO}$ :

$$\mathcal{E} = \sum_{n=1}^{n_{\text{total}}} \left( \frac{\left( F_{\text{CH}_3\text{OH},\text{predicted}} - F_{\text{CH}_3\text{OH},\text{measured}} \right)^2 + \left( F_{\text{CO},\text{predicted}} - F_{\text{CO},\text{measured}} \right)^2}{F_{\text{CH}_3\text{OH},\text{predicted}} + F_{\text{CO},\text{predicted}}} \right)_n \quad (16)$$

Fitted kinetic parameters are reported in **Supplementary Tables 11-12**. The mean absolute percentage error ( $MAPE$ ) between predicted and measured catalytic performance metrics,  $q$ , including  $X_{\text{CO}_2}$ ,  $S_{\text{MeOH}}$ ,  $Y_{\text{MeOH}}$ , or  $STY_{\text{MeOH}}$ , as defined in **Equation 17**:

$$MAPE_q = \frac{1}{N_{\text{total}}} \sum_{N=1}^{N_{\text{total}}} \left( \frac{|q_{\text{predicted}} - q_{\text{measured}}|}{q_{\text{predicted}}} \right)_N \quad (17)$$



**Supplementary Table 1.** Summary of a Materials Project database search for experimentally reported monoclinic metal oxides with band gaps exceeding 3.5 eV<sup>9</sup>.

| ID <sup>a</sup> | Formula                        | Energy above Hull <sup>b</sup><br>(eV atom <sup>-1</sup> ) | Band gap<br>(eV) |
|-----------------|--------------------------------|------------------------------------------------------------|------------------|
| mp-2858         | ZrO <sub>2</sub>               | 0                                                          | 3.53             |
| mp-352          | HfO <sub>2</sub>               | 0                                                          | 4.02             |
| mp-1582         | As <sub>2</sub> O <sub>3</sub> | 0                                                          | 4.03             |
| mp-1581         | As <sub>2</sub> O <sub>3</sub> | <0.01                                                      | 3.63             |
| mp-1194715      | As <sub>2</sub> O <sub>3</sub> | <0.01                                                      | 3.62             |
| mp-669426       | SiO <sub>2</sub>               | <0.01                                                      | 5.54             |
| mp-556654       | SiO <sub>2</sub>               | 0.01                                                       | 5.61             |
| mp-1200292      | SiO <sub>2</sub>               | 0.02                                                       | 5.70             |

<sup>a</sup> Unique Materials Project identifier. <sup>b</sup> Stability metric, where 0 eV atom<sup>-1</sup> indicates thermodynamic stability.

**Supplementary Table 2.** Overview of synthesis, nomenclature, composition, and textural properties of mixed binary InMO<sub>x</sub> catalysts (M = Hf, Zr).

| Catalyst code                                             | Synthesis route <sup>a</sup> | In <sub>2</sub> O <sub>3</sub> <sup>b</sup><br>(wt%) | In <sub>2</sub> O <sub>3</sub> <sup>c</sup><br>(wt%) | S <sub>BET</sub> <sup>d</sup><br>(m <sup>2</sup> g <sup>-1</sup> ) | d <sub>MO<sub>x</sub></sub> <sup>e</sup><br>(nm) |
|-----------------------------------------------------------|------------------------------|------------------------------------------------------|------------------------------------------------------|--------------------------------------------------------------------|--------------------------------------------------|
| 1InHfO <sub>x</sub>                                       | FSP                          | 1                                                    | 0.95                                                 | 53                                                                 | 13.2                                             |
| 2InHfO <sub>x</sub>                                       | FSP                          | 2                                                    | 1.93                                                 | 51                                                                 | 14.3                                             |
| 3InHfO <sub>x</sub>                                       | FSP                          | 3                                                    | 3.10                                                 | 60                                                                 | 13.2                                             |
| 5InHfO <sub>x</sub>                                       | FSP                          | 5                                                    | 5.06                                                 | 57                                                                 | 17.2                                             |
| 7InHfO <sub>x</sub>                                       | FSP                          | 7                                                    | 7.11                                                 | 52                                                                 | 14.3                                             |
| 10InHfO <sub>x</sub>                                      | FSP                          | 10                                                   | 9.89                                                 | 61                                                                 | 14.3                                             |
| In <sub>2</sub> O <sub>3</sub> /HfO <sub>2</sub> (P),WI   | WI of HfO <sub>2</sub> (P)   | 2                                                    | 2.21                                                 | 75                                                                 | 6.4                                              |
| InHfO <sub>x</sub> ,CP                                    | CP                           | 2                                                    | 2.14                                                 | 80                                                                 | 10.7                                             |
| In <sub>2</sub> O <sub>3</sub> /HfO <sub>2</sub> (FSP),WI | WI of HfO <sub>2</sub> (FSP) | 2                                                    | 1.98                                                 | 69                                                                 | 12.3                                             |
| HfO <sub>2</sub> (P)                                      | P                            | -                                                    | -                                                    | 81                                                                 | 12.3                                             |
| HfO <sub>2</sub> (FSP)                                    | FSP                          | -                                                    | -                                                    | 63                                                                 | 13.2                                             |
| 1InZrO <sub>x</sub>                                       | FSP                          | 1                                                    | 1.13                                                 | 102                                                                | 10.7                                             |
| 2InZrO <sub>x</sub>                                       | FSP                          | 2                                                    | 2.04                                                 | 96                                                                 | 13.2                                             |
| 3InZrO <sub>x</sub>                                       | FSP                          | 3                                                    | 3.01                                                 | 91                                                                 | 9.5                                              |
| 5InZrO <sub>x</sub>                                       | FSP                          | 5                                                    | 4.99                                                 | 95                                                                 | 12.3                                             |
| 7InZrO <sub>x</sub>                                       | FSP                          | 7                                                    | 7.19                                                 | 100                                                                | 11.5                                             |
| 10InZrO <sub>x</sub>                                      | FSP                          | 10                                                   | 9.98                                                 | 110                                                                | 12.3                                             |
| ZrO <sub>2</sub>                                          | FSP                          | -                                                    | -                                                    | 96                                                                 | 12.4                                             |
| GaHfO <sub>x</sub>                                        | FSP                          | 2                                                    | 1.83                                                 | 58                                                                 | 10.9                                             |
| ZnHfO <sub>x</sub>                                        | FSP                          | 2                                                    | 1.51                                                 | 55                                                                 | 13.4                                             |

<sup>a</sup> Notation: P - precipitation; FSP - flame spray pyrolysis; CP - coprecipitation. <sup>b</sup> Targeted.

<sup>c</sup> Determined by ICP-OES. <sup>d</sup> Determined by the BET method. <sup>e</sup> Determined from the Scherrer equation applied to the m-ZrO<sub>2</sub>(11-1) or m-HfO<sub>2</sub>(11-1) reflections.

**Supplementary Table 3.** Catalytic performance metrics of the InHfO<sub>x</sub> and InZrO<sub>x</sub> catalysts in CO<sub>2</sub> hydrogenation.

| Catalyst <sup>a</sup>                                      | $X_{\text{CO}_2}$ <sup>b</sup><br>(%) | $S_{\text{MeOH}}$ <sup>c</sup><br>(%) | $STY_{\text{MeOH}}^{\text{d}}$<br>(g <sub>MeOH</sub> h <sup>-1</sup> g <sub>In</sub> <sup>-1</sup> ) | $STY_{\text{MeOH}}^{\text{d}}$<br>(g <sub>MeOH</sub> h <sup>-1</sup> g <sub>cat</sub> <sup>-1</sup> ) | $STY_{\text{MeOH}}^{\text{d}}$<br>(mg <sub>MeOH</sub> h <sup>-1</sup> m <sub>cat</sub> <sup>-2</sup> ) |
|------------------------------------------------------------|---------------------------------------|---------------------------------------|------------------------------------------------------------------------------------------------------|-------------------------------------------------------------------------------------------------------|--------------------------------------------------------------------------------------------------------|
| 1InHfO <sub>x</sub>                                        | 3.1                                   | 31                                    | 6.16                                                                                                 | 0.06                                                                                                  | 0.95                                                                                                   |
| 2InHfO <sub>x</sub>                                        | 4.9                                   | 57                                    | 9.31                                                                                                 | 0.15                                                                                                  | 3.02                                                                                                   |
| 3InHfO <sub>x</sub>                                        | 5.8                                   | 55                                    | 7.69                                                                                                 | 0.19                                                                                                  | 3.18                                                                                                   |
| 5InHfO <sub>x</sub>                                        | 5.6                                   | 83                                    | 6.72                                                                                                 | 0.28                                                                                                  | 4.87                                                                                                   |
| 7InHfO <sub>x</sub>                                        | 7.3                                   | 70                                    | 5.27                                                                                                 | 0.31                                                                                                  | 2.87                                                                                                   |
| 10InHfO <sub>x</sub>                                       | 6.8                                   | 70                                    | 3.37                                                                                                 | 0.28                                                                                                  | 4.57                                                                                                   |
| In <sub>2</sub> O <sub>3</sub> /HfO <sub>2</sub> (P), WI   | 1.4                                   | 1                                     | 0.00                                                                                                 | 0.00                                                                                                  | 0.00                                                                                                   |
| InHfO <sub>x</sub> , CP                                    | 1.6                                   | 3                                     | 0.00                                                                                                 | 0.00                                                                                                  | 0.00                                                                                                   |
| In <sub>2</sub> O <sub>3</sub> /HfO <sub>2</sub> (FSP), WI | 3.7                                   | 17                                    | 2.52                                                                                                 | 0.04                                                                                                  | 0.97                                                                                                   |
| HfO <sub>2</sub> (FSP)                                     | 2.7                                   | 1                                     | 0.00                                                                                                 | 0.00                                                                                                  | 0.00                                                                                                   |
| HfO <sub>2</sub> (P)                                       | 0.0                                   | 0                                     | 0.00                                                                                                 | 0.00                                                                                                  | 0.00                                                                                                   |
| In <sub>2</sub> O <sub>3</sub>                             | 5.8                                   | 46                                    | 0.20                                                                                                 | 0.17                                                                                                  | 2.07                                                                                                   |
| 1InZrO <sub>x</sub>                                        | 2.4                                   | 28                                    | 5.51                                                                                                 | 0.05                                                                                                  | 0.45                                                                                                   |
| 2InZrO <sub>x</sub>                                        | 3.2                                   | 44                                    | 5.56                                                                                                 | 0.09                                                                                                  | 0.91                                                                                                   |
| 3InZrO <sub>x</sub>                                        | 4.5                                   | 43                                    | 5.16                                                                                                 | 0.13                                                                                                  | 1.41                                                                                                   |
| 5InZrO <sub>x</sub>                                        | 5.7                                   | 62                                    | 5.14                                                                                                 | 0.21                                                                                                  | 2.13                                                                                                   |
| 7InZrO <sub>x</sub>                                        | 5.4                                   | 64                                    | 3.93                                                                                                 | 0.22                                                                                                  | 2.28                                                                                                   |
| 10InZrO <sub>x</sub>                                       | 6.6                                   | 58                                    | 3.07                                                                                                 | 0.25                                                                                                  | 2.65                                                                                                   |
| ZrO <sub>2</sub>                                           | 2.9                                   | 0                                     | 0.00                                                                                                 | 0.00                                                                                                  | 0.00                                                                                                   |

<sup>a</sup> Catalyst overview in **Supplementary Table 1**. <sup>b</sup> CO<sub>2</sub> conversion. <sup>c</sup> Methanol selectivity.

<sup>d</sup> Methanol space-time yield normalized per gram of indium, gram of catalyst, or specific surface area, respectively. Reaction conditions:  $T = 553$  K,  $P = 50$  bar, CO<sub>2</sub>:H<sub>2</sub> = 1:4,  $GHSV = 24'000$  cm<sup>3</sup> h<sup>-1</sup> g<sub>cat</sub><sup>-1</sup>.

**Supplementary Table 4.** Formation energies ( $E_f$ ) associated with monoclinic, tetragonal, and cubic  $\text{HfO}_2$  and  $\text{ZrO}_2$  polymorphs.

| Crystal system | Space group  | $E_{f,\text{ZrO}_2}$<br>(eV f.u. <sup>-1</sup> ) | $E_{f,\text{HfO}_2}$<br>(eV f.u. <sup>-1</sup> ) |
|----------------|--------------|--------------------------------------------------|--------------------------------------------------|
| monoclinic     | $P2_1/c$     | -10.39                                           | -10.73                                           |
| tetragonal     | $P4_2/nmc$   | -10.28                                           | -10.56                                           |
| cubic          | $Fm\bar{3}m$ | -10.19                                           | -10.46                                           |

**Supplementary Table 5.** Surface composition of selected  $\text{InHfO}_x$  and  $\text{InZrO}_x$  catalysts.

| Catalyst <sup>a</sup>      | Form                      | In/M <sup>b</sup><br>(at%) | O/M <sup>b</sup><br>(at%) |
|----------------------------|---------------------------|----------------------------|---------------------------|
| $\text{HfO}_2(\text{P})$   | fresh                     | -                          | 2.04                      |
| $\text{HfO}_2(\text{FSP})$ | fresh                     | -                          | 1.73                      |
| $2\text{InHfO}_x$          | fresh                     | 0.09                       | 1.83                      |
| $2\text{InHfO}_x$          | equilibrated <sup>c</sup> | 0.09                       | 1.73                      |
| $2\text{InZrO}_x$          | fresh                     | 0.06                       | 1.68                      |
| $2\text{InZrO}_x$          | equilibrated              | 0.06                       | 1.57                      |

<sup>a</sup> Catalyst overview in **Supplementary Table 1.**

<sup>b</sup> Determined by XPS. <sup>c</sup> After 20 h under  $\text{CO}_2$  hydrogenation, reaction conditions indicated in **Supplementary Table 3.**

**Supplementary Table 6.** Adsorption energies ( $E_{\text{ads}}$ ) of monomeric and dimeric  $\text{In}(\text{OH})_3$  species, and aggregation energy ( $E_{\text{agg}}$ ) for the conversion of a monomer into a dimer.

| Surface           | $E_{\text{ads}}$ (eV)            |                                | $E_{\text{agg}}$ (eV) |
|-------------------|----------------------------------|--------------------------------|-----------------------|
|                   | $\text{In}(\text{OH})_3$ monomer | $\text{In}(\text{OH})_3$ dimer |                       |
| m- $\text{HfO}_2$ | -1.50                            | -1.04                          | 1.97                  |
| m- $\text{ZrO}_2$ | -1.30                            | -0.84                          | 1.76                  |

**Supplementary Table 7.** Electron paramagnetic resonance (EPR) spectrometer settings.

| Experiment (-) | $T$ (K) | Microwave frequency (GHz) | Central field (G) | Sweep width (G) | Modulation amplitude <sup>a</sup> (G) | Conversion time (ms) | Time constant (ms) |
|----------------|---------|---------------------------|-------------------|-----------------|---------------------------------------|----------------------|--------------------|
| ex situ        | 298     | 9.4                       | 4050              | 8000            | 5                                     | 81.92                | 40.96              |
| in situ        | 298     | 9.2                       | 3000              | 5900            | 3                                     | 84.46                | 40.96              |
| in situ        | 553     | 9.2                       | 3000              | 5900            | 3                                     | 84.46                | 40.96              |

<sup>a</sup> Modulation frequency (kHz) and power attenuation (dB) were set to 100 kHz and 20 dB.

**Supplementary Table 8.** Relative amount of EPR active species in 2InZrO<sub>x</sub> under distinct working conditions detected via in-situ EPR experiments. The data was fitted using particle swarm optimization method (See **Method**).

| Conditions                      | Vo• <sup>a</sup> (%) | Zr <sup>3+a</sup> (%) | O <sup>2-</sup> (%) |
|---------------------------------|----------------------|-----------------------|---------------------|
| fresh                           | 60                   | 40                    | 0                   |
| He                              | 100                  | 0                     | 0                   |
| H <sub>2</sub>                  | 8                    | 0                     | 92                  |
| CO <sub>2</sub>                 | 0                    | 0                     | 100                 |
| CO <sub>2</sub> +H <sub>2</sub> | 100                  | 0                     | 0                   |

<sup>a</sup> Oxygen vacancy with single electron trapped (Vo•) and corresponding reduced metal cation Zr<sup>3+</sup> upon vacancy generation. See **Supplementary Note 2**.

**Supplementary Table 9.** Methanol adsorption energies ( $E_{\text{ads}}$ ) over hydroxylated In single atoms anchored on monoclinic and tetragonal HfO<sub>2</sub> or ZrO<sub>2</sub> surfaces.

| Model                                   | $E_{\text{ads}}$ (eV) |
|-----------------------------------------|-----------------------|
| In(OH) <sub>3</sub> -m-HfO <sub>2</sub> | -1.04                 |
| In(OH) <sub>3</sub> -m-ZrO <sub>2</sub> | -1.11                 |
| In(OH) <sub>3</sub> -t-ZrO <sub>2</sub> | -1.20                 |

**Supplementary Table 10.** H<sub>2</sub> chemisorption of HfO<sub>2</sub> or ZrO<sub>2</sub> supports prepared by flame spray pyrolysis (FSP).

| Support                | H <sub>2</sub> uptake<br>(mm <sup>3</sup> m <sup>-2</sup> ) |
|------------------------|-------------------------------------------------------------|
| HfO <sub>2</sub> (FSP) | 0.81                                                        |
| ZrO <sub>2</sub> (FSP) | 0.47                                                        |

**Supplementary Table 11.** Rate expressions and thermodynamic parameters of the two-site LHHW kinetic model describing methanol (MeOH) and CO (RWGS) formation from CO<sub>2</sub> over the 2InHfO<sub>x</sub> and 2InZrO<sub>x</sub> catalysts (see **Supplementary Note 4**).

| Parameter            | Expression                                                                                                                                                                                                                                                                                                                  | Unit                                                                     |
|----------------------|-----------------------------------------------------------------------------------------------------------------------------------------------------------------------------------------------------------------------------------------------------------------------------------------------------------------------------|--------------------------------------------------------------------------|
| $r_{\text{MeOH}}$    | $k_{\text{MeOH}} \frac{\theta_{\#}^2 \theta_{*}}{\sqrt{p_{\text{H}_2}}} \left( p_{\text{CO}_2} p_{\text{H}_2}^3 - \frac{p_{\text{CH}_3\text{OH}} p_{\text{H}_2\text{O}}}{K_{\text{eq,MeOH}}} \right)$                                                                                                                       | mol s <sup>-1</sup> kg <sub>cat</sub> <sup>-1</sup>                      |
| $r_{\text{RWGS}}$    | $k_{\text{RWGS}} \theta_{\#} \theta_{*} \left( p_{\text{CO}_2} p_{\text{H}_2} - \frac{p_{\text{H}_2\text{O}} p_{\text{CO}}}{K_{\text{eq,RWGS}}} \right)$                                                                                                                                                                    | mol s <sup>-1</sup> kg <sub>cat</sub> <sup>-1</sup>                      |
| $k_{\text{MeOH}}$    | $k_{\text{MeOH,ref}} \exp \left( \frac{E_{\text{a,MeOH}}}{R} \left( \frac{1}{T_{\text{ref}}} - \frac{1}{T} \right) \right)$                                                                                                                                                                                                 | mol s <sup>-1</sup> bar <sup>-4</sup><br>kg <sub>cat</sub> <sup>-1</sup> |
| $k_{\text{RWGS}}$    | $k_{\text{RWGS,ref}} \exp \left( \frac{E_{\text{a,RWGS}}}{R} \left( \frac{1}{T_{\text{ref}}} - \frac{1}{T} \right) \right)$                                                                                                                                                                                                 | mol s <sup>-1</sup> bar <sup>-2</sup><br>kg <sub>cat</sub> <sup>-1</sup> |
| $\theta_{*}$         | $\left( 1 + K_{\text{CO}_2} p_{\text{CO}_2} + K_{\text{CO}} p_{\text{CO}} + K_{\text{CH}_3\text{OH}} p_{\text{CH}_3\text{OH}} + K_1 K_{\text{CO}_2} p_{\text{CO}_2} \sqrt{K_{\text{H}_2} p_{\text{H}_2}} + \frac{K_6 K_{\text{CH}_3\text{OH}} p_{\text{CH}_3\text{OH}}}{\sqrt{K_{\text{H}_2} p_{\text{H}_2}}} \right)^{-1}$ | -                                                                        |
| $\theta_{\#}$        | $\left( 1 + \sqrt{K_{\text{H}_2} p_{\text{H}_2}} + K_{\text{H}_2\text{O}} p_{\text{H}_2\text{O}} \right)^{-1}$                                                                                                                                                                                                              | -                                                                        |
| $K_{\text{eq,MeOH}}$ | $\exp \left( 39.85 + \frac{3.17 \times 10^3}{T} - 9.52 \ln(T) + 56.77 \times 10^{-4} T - 57.5 \times 10^{-8} T^2 + \frac{64.95 \times 10^3}{T^2} \right)$                                                                                                                                                                   | bar <sup>-2</sup>                                                        |
| $K_{\text{eq,RWGS}}$ | $\exp \left( 18.01 - \frac{5.87 \times 10^3}{T} - 1.86 \ln(T) + 2.70 \times 10^{-4} T + \frac{58.2 \times 10^3}{T^2} \right) -$                                                                                                                                                                                             | -                                                                        |

**Supplementary Table 12.** Fitted parameters of the two-site LHHW kinetic model for the 2InHfO<sub>x</sub> and 2InZrO<sub>x</sub> catalysts.

| Parameter                  | 2InHfO <sub>x</sub>   | 2InZrO <sub>x</sub>   | Unit                                                            |
|----------------------------|-----------------------|-----------------------|-----------------------------------------------------------------|
| $K_{\text{MeOH,ref}}$      | $6.01 \times 10^{-5}$ | $3.08 \times 10^{-5}$ | $\text{mol s}^{-1} \text{bar}^{-4} \text{kg}_{\text{cat}}^{-1}$ |
| $k_{\text{RWGS,ref}}$      | $1.39 \times 10^{-3}$ | $7.71 \times 10^{-4}$ | $\text{mol s}^{-1} \text{bar}^{-2} \text{kg}_{\text{cat}}^{-1}$ |
| $E_{\text{a,MeOH}}$        | 82                    | 87                    | $\text{kJ mol}^{-1}$                                            |
| $E_{\text{a,RWGS}}$        | 124                   | 96                    | $\text{kJ mol}^{-1}$                                            |
| $K_1$                      | 0.269                 | 0.346                 | -                                                               |
| $K_6$                      | 0.315                 | 1.07                  | -                                                               |
| $K_{\text{H}_2}$           | 3.08                  | 3.28                  | $\text{bar}^{-1}$                                               |
| $K_{\text{CO}_2}$          | 0.316                 | 0.168                 | $\text{bar}^{-1}$                                               |
| $K_{\text{CO}}$            | 0.090                 | 15.2                  | $\text{bar}^{-1}$                                               |
| $K_{\text{CH}_3\text{OH}}$ | 16.3                  | 8.02                  | $\text{bar}^{-1}$                                               |
| $K_{\text{H}_2\text{O}}$   | 3.14                  | 2.71                  | $\text{bar}^{-1}$                                               |

**Supplementary Table 13.** Summary of chemicals used for catalyst synthesis.

| Catalyst <sup>a</sup>                                     | Precursor <sup>b</sup>                       | Supplier       | Purity    |
|-----------------------------------------------------------|----------------------------------------------|----------------|-----------|
| HfO <sub>2</sub> (FSP)                                    | Hf(OnBu) <sub>4</sub>                        | ABCR           | 95%       |
| InHfO <sub>x</sub>                                        | In, Hf(OnBu) <sub>4</sub>                    | Polymet, ABCR  | 100%, 95% |
| HfO <sub>2</sub> (P)                                      | HfCl <sub>4</sub>                            | Strem          | 99%       |
| In <sub>2</sub> O <sub>3</sub> /HfO <sub>2</sub> (P),WI   | In(NO) <sub>3</sub> , HfCl <sub>4</sub>      | ABCR, Strem    | 100%, 99% |
| InHfO <sub>x</sub> (CP)                                   | In(NO) <sub>3</sub> , HfCl <sub>4</sub>      | ABCR, Strem    | 100%, 99% |
| In <sub>2</sub> O <sub>3</sub> /HfO <sub>2</sub> (FSP),WI | In(NO) <sub>3</sub> , Hf(OnBu) <sub>4</sub>  | ABCR, ABCR     | 100%, 95% |
| ZrO <sub>2</sub> (FSP)                                    | Zr(OEt) <sub>4</sub>                         | Polymet, ABCR  | 97%       |
| InZrO <sub>x</sub>                                        | In, Zr(OEt) <sub>4</sub>                     | Polymet, ACROS | 100%, 97% |
| GaHfO <sub>x</sub>                                        | Ga, Hf(OnBu) <sub>4</sub>                    | Polymet, ABCR  | 100%, 95% |
| ZnHfO <sub>x</sub>                                        | Zn(EHA) <sub>2</sub> , Hf(OnBu) <sub>4</sub> | Polymet, ABCR  | 97%, 95%  |

<sup>a</sup> Catalyst overview in **Supplementary Table 2**. <sup>b</sup> Metal precursors in the desired molar ratio were dissolved in 2-ethylhexanoic acid and tetrahydrofuran (1/3 mass content).

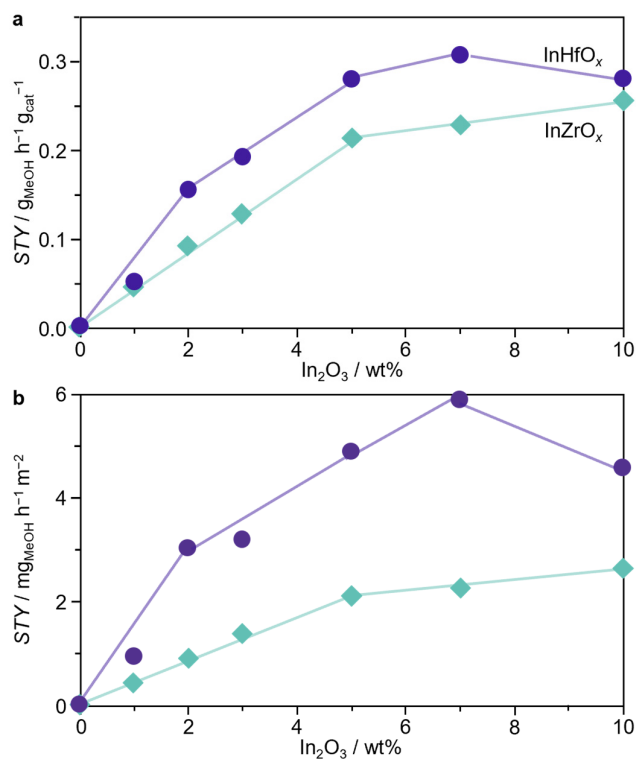

**Supplementary Fig. 1.** Methanol space-time yield (*STY*) of  $\text{InHfO}_x$  and  $\text{InZrO}_x$  catalysts with varying  $\text{In}_2\text{O}_3$  content, normalized per **a**, gram of catalysts or **b**, specific surface area. Reaction conditions:  $T = 553 \text{ K}$ ,  $P = 50 \text{ bar}$ ,  $\text{H}_2/\text{CO}_2 = 4$ ,  $GHSV = 24,000 \text{ cm}^3 \text{ h}^{-1} \text{ g}_{\text{cat}}^{-1}$ ,  $t_{\text{os}} = 20 \text{ h}$ .

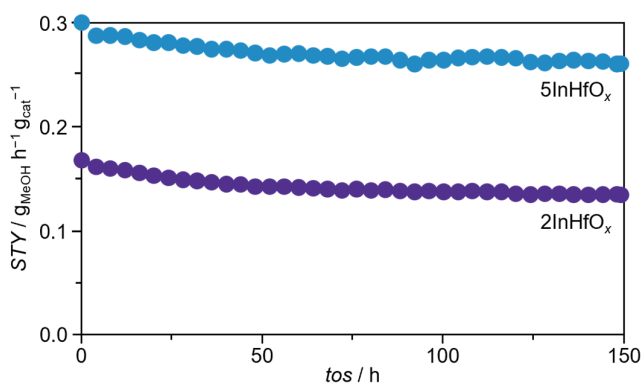

**Supplementary Fig. 2.** Methanol *STY* versus time on stream ( $t_{\text{os}}$ ) over selected  $\text{InHfO}_x$  catalysts. Reaction conditions:  $T = 553 \text{ K}$ ,  $P = 50 \text{ bar}$ ,  $\text{H}_2/\text{CO}_2 = 4$ ,  $GHSV = 24,000 \text{ cm}^3 \text{ h}^{-1} \text{ g}_{\text{cat}}^{-1}$ ,  $t_{\text{os}} = 150 \text{ h}$ .



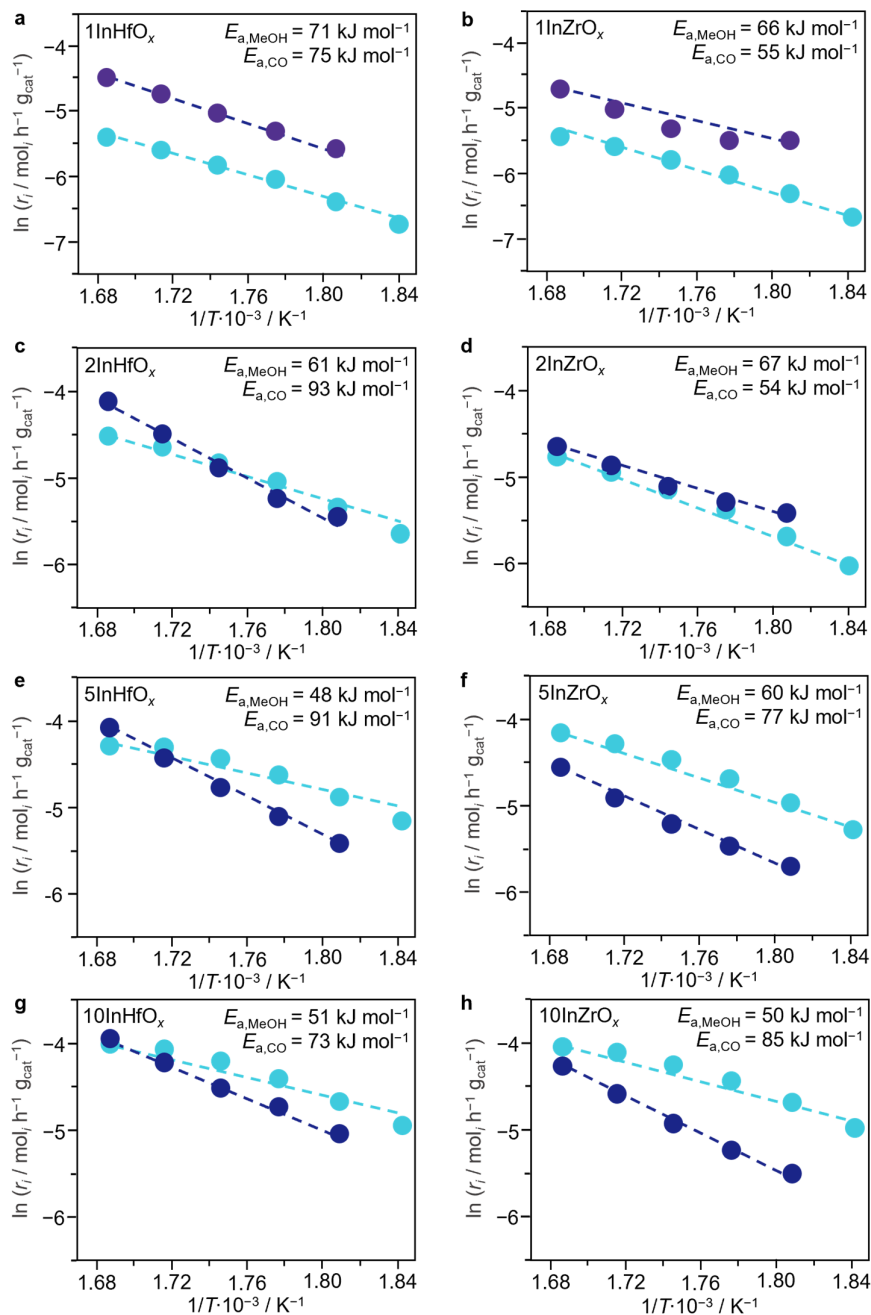

**Supplementary Fig. 3.** Arrhenius plots used to determine the apparent activation energies for

CO<sub>2</sub> hydrogenation to methanol and to CO (RWGS) over selected InHfO<sub>x</sub> and InZrO<sub>x</sub> catalysts.

Reaction conditions:  $T = 533\text{--}593 \text{ K}$ ,  $P = 50 \text{ bar}$ ,  $\text{H}_2/\text{CO}_2 = 4$ , and

$GHSV = 48,000 \text{ cm}^3 \text{ h}^{-1} \text{ g}_{\text{cat}}^{-1}$ .

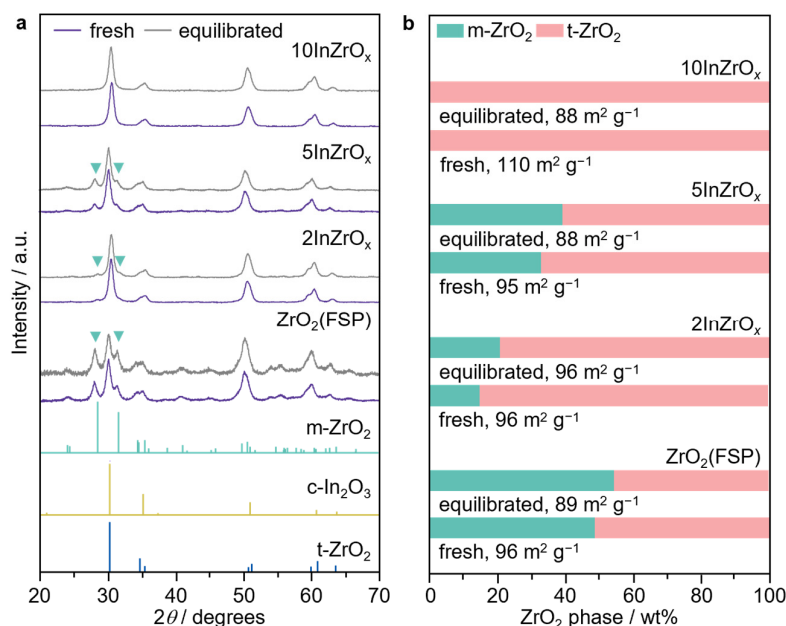

**Supplementary Fig. 4.** **a**, XRD patterns of InZrO<sub>x</sub> catalysts in fresh (purple lines) and equilibrated (grey lines) forms. **b**, Corresponding phase composition and surface areas of the catalysts. Reaction conditions as indicated in **Supplementary Fig. 1**.

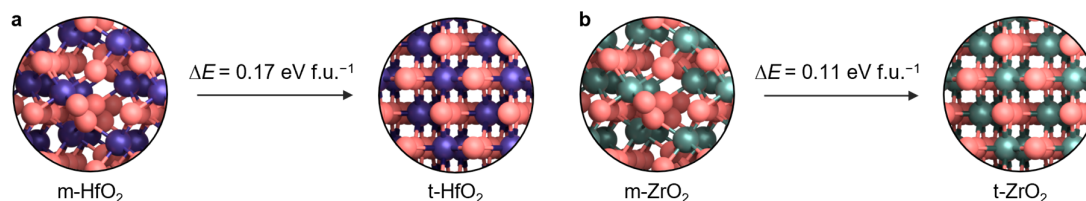

**Supplementary Fig. 5.** Potential energy difference between monoclinic and tetragonal polymorphs of **a**, HfO<sub>2</sub> and **b**, ZrO<sub>2</sub>.

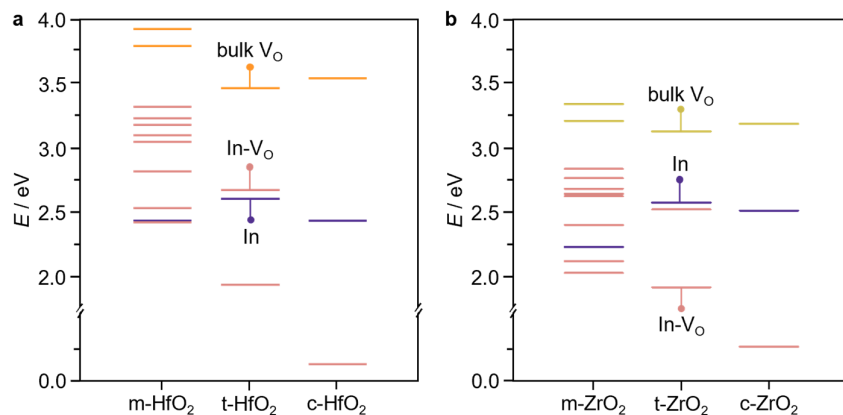

**Supplementary Fig. 6. a,b**, Potential energy of monoclinic (m), tetragonal (t), and cubic (c) in the HfO<sub>2</sub> (a) and ZrO<sub>2</sub> (b) bulk supercells upon lattice substitution of indium single atom in the presence (In-V<sub>O</sub>) or absence (In) of an oxygen vacancy. Oxygen vacancy formation was assessed for all non-equivalent oxygen atoms of undoped systems. For InMO<sub>x</sub> models, we explored the vacancy formation for all distinct O coordinated to indium.

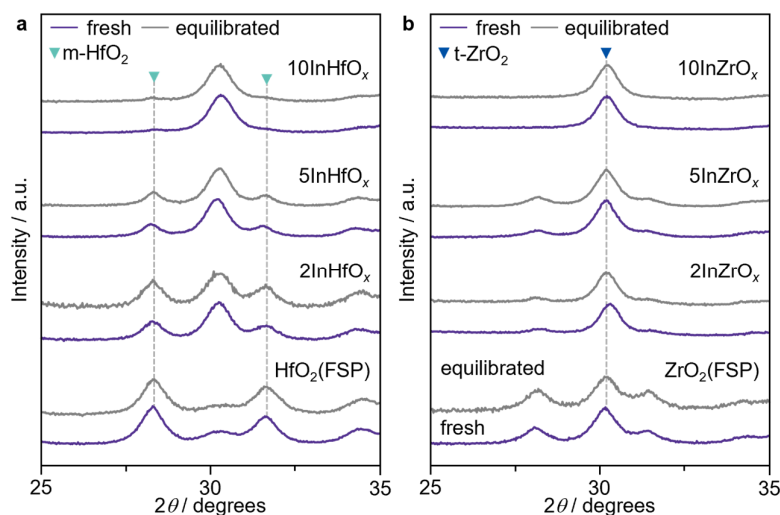

**Supplementary Fig. 7. a**, XRD patterns of **a**, InHfO<sub>x</sub> and **b**, InZrO<sub>x</sub> catalysts in fresh (purple lines) and equilibrated (grey lines) forms. The main reflections remain unchanged for both systems, indicating that indium atoms exist on the support surface as isolated sites, patches, or particles. Reaction conditions as indicated in **Supplementary Fig. 1**.

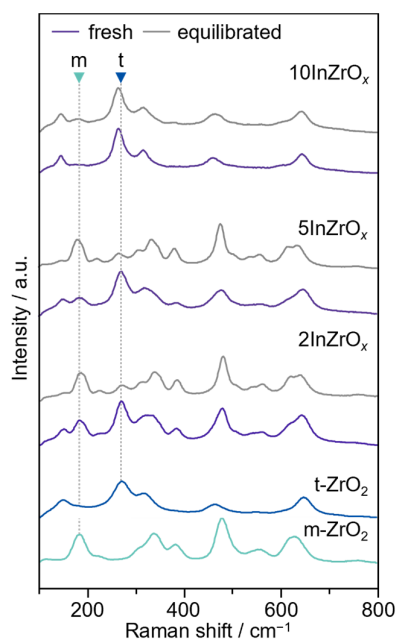

**Supplementary Fig. 8.** Raman spectra of InZrO<sub>x</sub> catalysts in fresh (purple lines) and equilibrated (grey lines) forms. Reaction conditions as indicated in **Supplementary Fig. 1**.

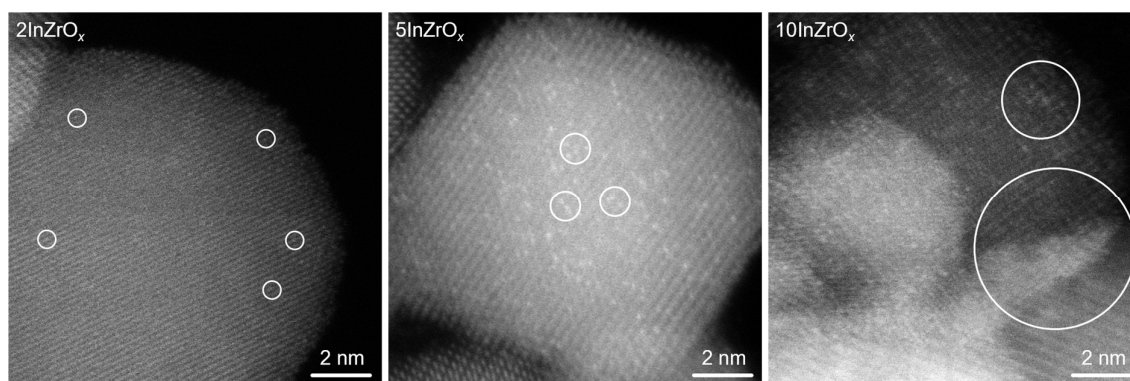

**Supplementary Fig. 9.** HAADF-STEM images of selected InZrO<sub>x</sub> catalysts in fresh form. White circles highlight distinct InO<sub>x</sub> species, ranging from isolated single atoms to larger clusters and patches.

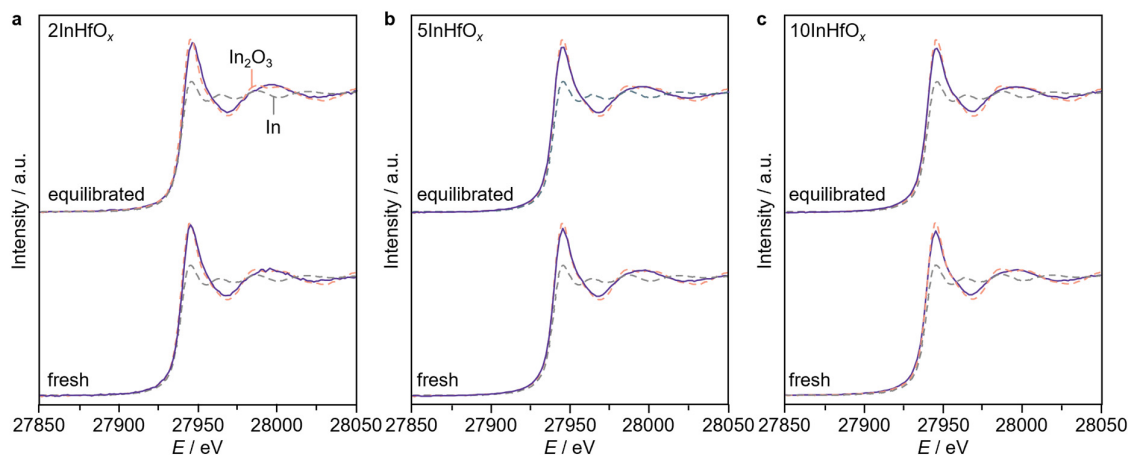

**Supplementary Fig. 10.** Ex-situ In *K*-edge XANES spectra of **a**, 2InHfO<sub>x</sub>, **b**, 5InHfO<sub>x</sub>, and **c**, 10InHfO<sub>x</sub> catalysts in fresh and equilibrated forms. Reference spectra of bulk In<sub>2</sub>O<sub>3</sub> and In metal are shown as pink and grey dash lines, respectively.

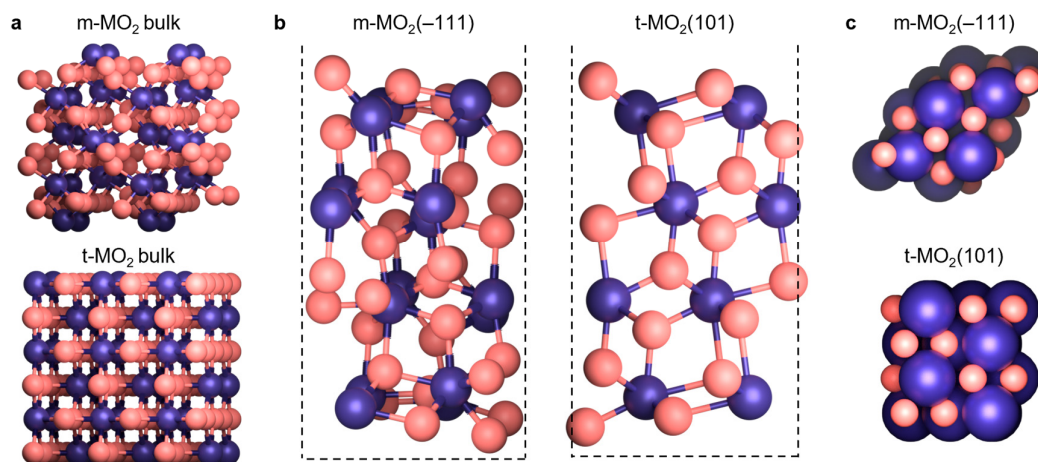

**Supplementary Fig. 11.** DFT models of **a**, bulk structures, and **b,c**, side and top views of m-HfO<sub>2</sub> and t-HfO<sub>2</sub> slab models used to evaluate the incorporation of single-atom indium species and oxygen vacancy formation. Colour code: Hf - purple; O - salmon pink. Equivalent models for monoclinic and tetragonal ZrO<sub>2</sub> were used in the corresponding simulations, differing only in lattice parameters.

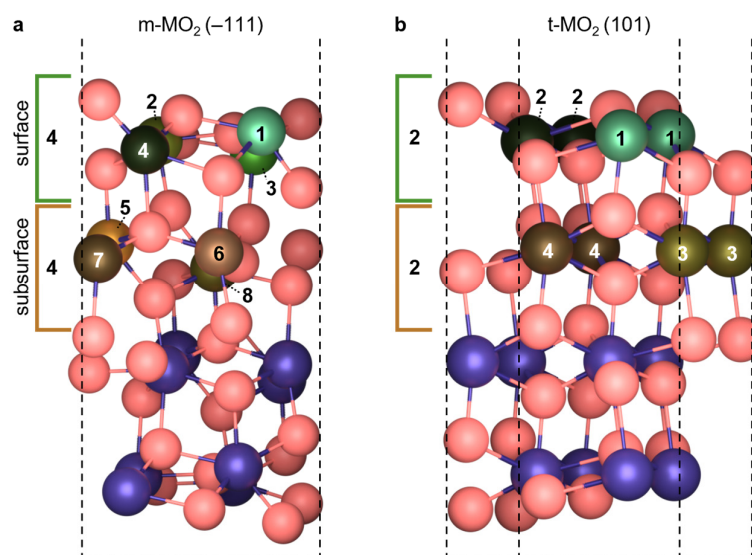

**Supplementary Fig. 12.** Side view of **a**,  $m\text{-HfO}_2$  and **b**,  $t\text{-HfO}_2$  slab models used in DFT simulations to assess indium incorporation at all non-equivalent Hf sites. Colour code: Distinct surface and subsurface Hf sites numbered 1-8 - varying shades of green and orange; Hf atoms in bulk positions - dark purple; O atoms - salmon pink. Equivalent models for  $m\text{-ZrO}_2$  and  $t\text{-ZrO}_2$  were used in the corresponding simulations, differing only slightly in lattice parameters.

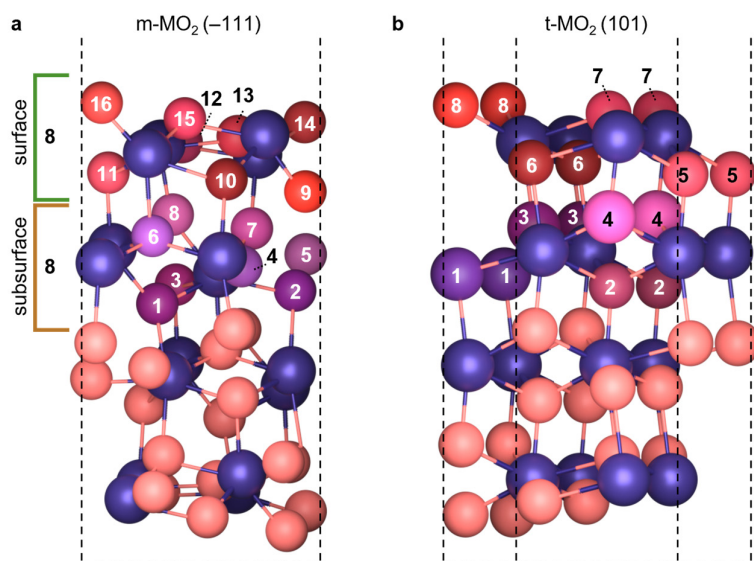

**Supplementary Fig. 13.** Side views of **a**, m-HfO<sub>2</sub> and **b**, t-HfO<sub>2</sub> slab models used in DFT simulations to evaluate oxygen vacancy formation at all non-equivalent oxygen sites. Colour code: Distinct surface and subsurface O sites numbered 1-16 – distinct red and purple shades; O atoms in bulk positions - salmon pink, Hf atoms - dark purple. Equivalent monoclinic and tetragonal ZrO<sub>2</sub> models were also used, differing only in lattice parameters.

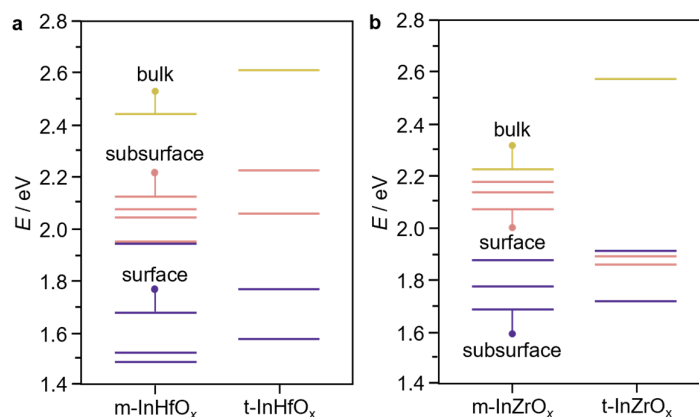

**Supplementary Fig. 14.** Potential energy of single indium atom substitution into **a**, HfO<sub>2</sub> and **b**, ZrO<sub>2</sub> monoclinic and tetragonal slab models. Indium atoms were substituted at all non-equivalent surface and subsurface Hf or Zr sites, respectively. The energy for substituting an indium atom in the bulk, representing one site per polymorph, is shown for reference.

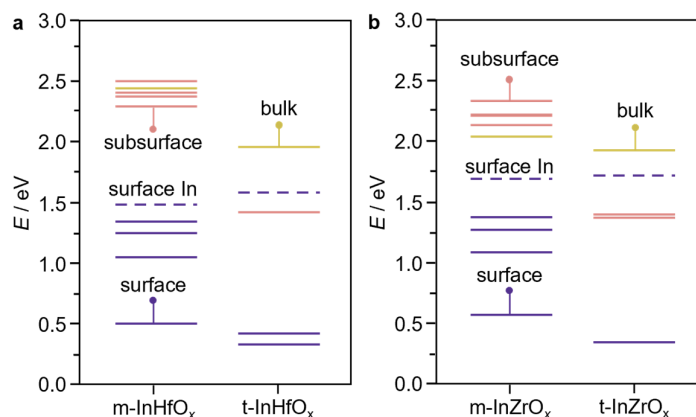

**Supplementary Fig. 15.** Potential energy of single indium atom substitution into **a**, HfO<sub>2</sub> and **b**, ZrO<sub>2</sub> monoclinic and tetragonal models containing one oxygen vacancy. Indium atoms were substituted into all non-equivalent surface and subsurface Hf or Zr sites, respectively, and oxygen vacancy formation was assessed for all non-equivalent oxygens. The energy of substituting an indium atom in the bulk, representing a single site per polymorph, is shown in yellow, and the lowest energy for substituting an indium atom without a vacancy (**Supplementary Fig. 14**) is shown with dashed lines for reference.



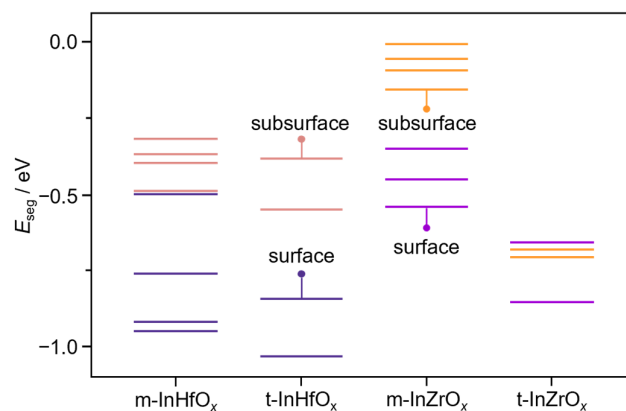

**Supplementary Fig. 16.** Segregation energies ( $E_{\text{seg}}$ ) for the migration of indium atom from bulk to surface and subsurface sites in distinct tetragonal and monoclinic slab models of  $\text{HfO}_2$  and  $\text{ZrO}_2$ .

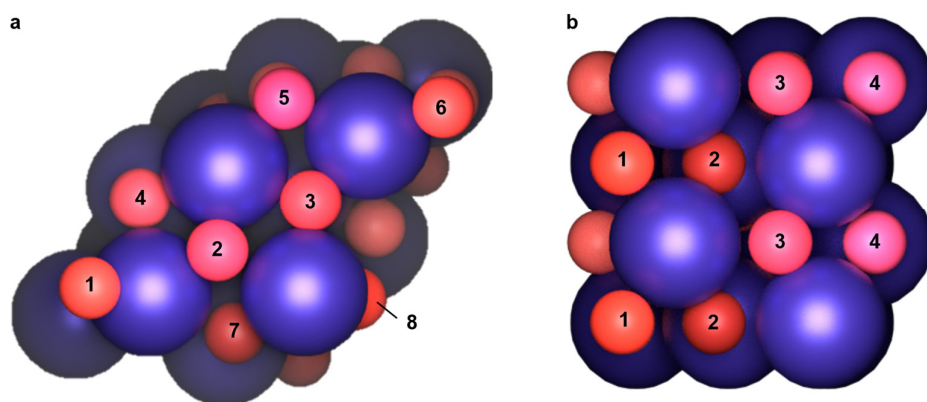

**Supplementary Fig. 17.** Top view of slab models of **a**, m- $\text{HfO}_2$  and **b**, t- $\text{HfO}_2$  used in DFT simulations to assess the anchoring of In atoms and hydroxylated In adatoms at various surface oxygen sites. Colour code: Distinct surface O sites numbered 1-8 (varying shades of red); M atoms in bulk positions (dark purple); O atoms (salmon pink). Models of monoclinic and tetragonal  $\text{ZrO}_2$  are analogous with minor lattice differences.

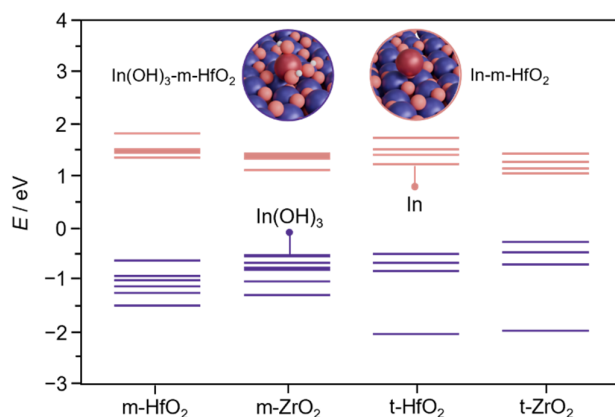

**Supplementary Fig. 18.** Comparison of adsorption energies of an indium atom and hydroxylated indium adatom on monoclinic and tetragonal HfO<sub>2</sub> and ZrO<sub>2</sub> polymorphs in the non-equivalent positions shown in **Supplementary Fig. 17**.

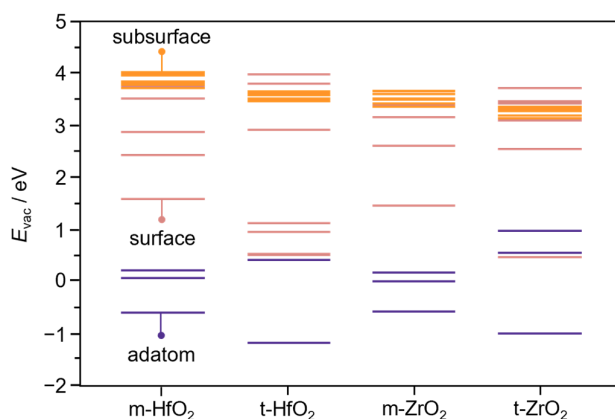

**Supplementary Fig. 19.** Vacancy formation energy ( $E_{\text{vac}}$ ) of a single oxygen vacancy for monoclinic and tetragonal HfO<sub>2</sub> and ZrO<sub>2</sub> models with In(OH)<sub>3</sub> adsorbed. Vacancy formation was explored for all non-equivalent oxygens in the surface/subsurface, as well as at three sites corresponding to the hydroxyl oxygen atoms of the adsorbed species.

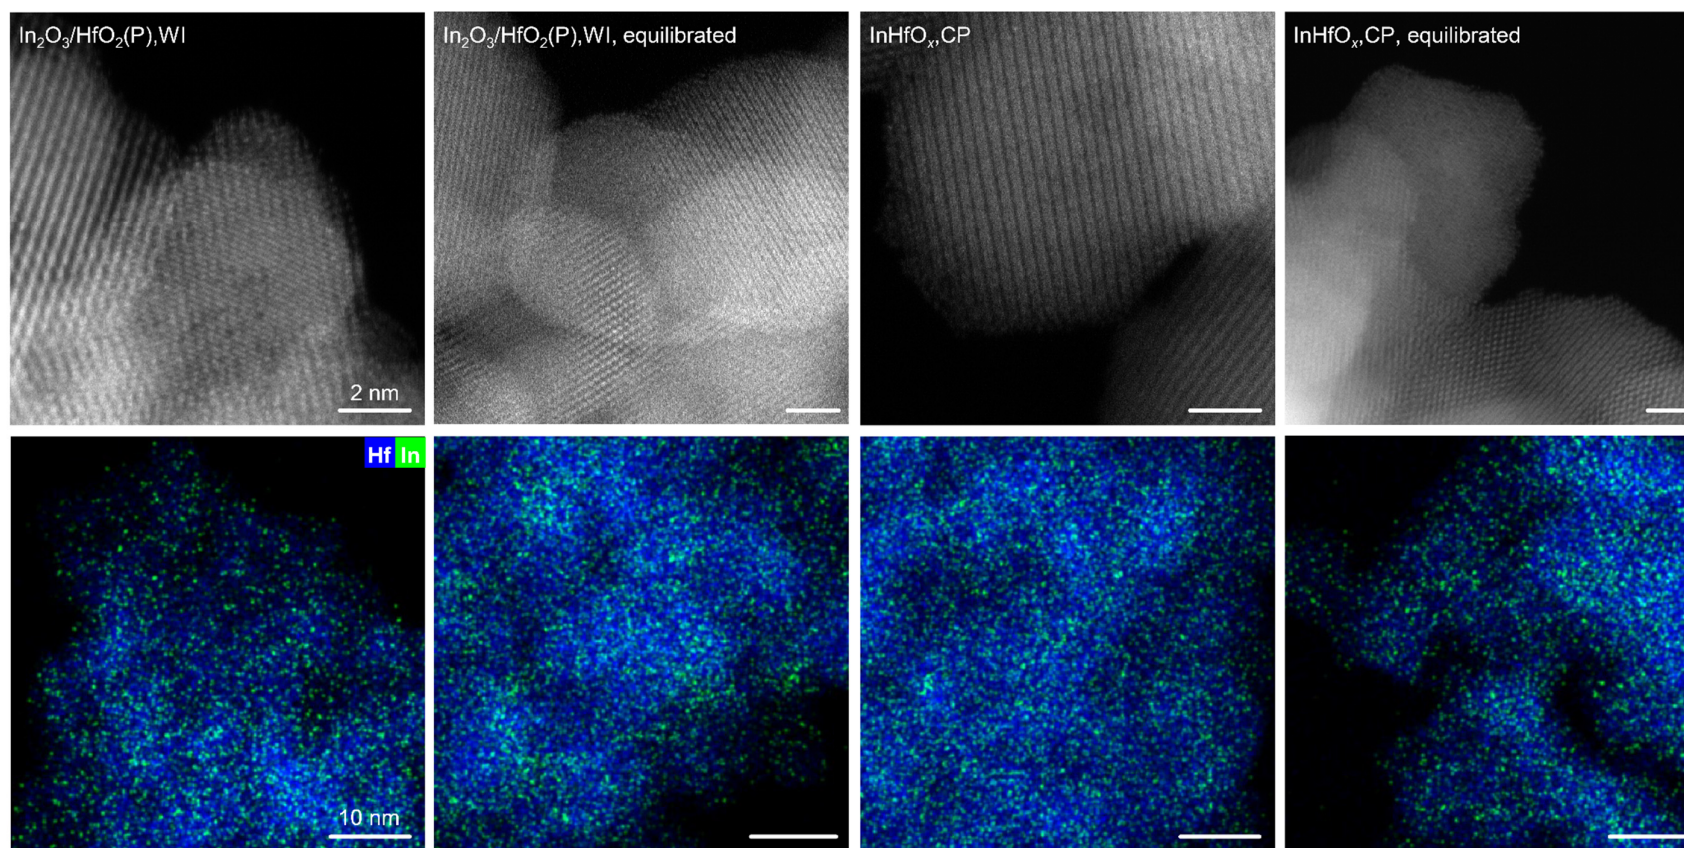

**Supplementary Fig. 20.** Representative HAADF-STEM images (top) and corresponding elemental maps (bottom) of  $\text{In}_2\text{O}_3/\text{HfO}_2(\text{P}), \text{WI}$  and  $\text{InHfO}_x, \text{CP}$  in fresh and equilibrated forms. The results confirm atomic dispersions of  $\text{InO}_x$  species in all cases. Catalyst codes as reported in **Supplementary Table 2**. Reaction condition as described in **Supplementary Fig. 1**.

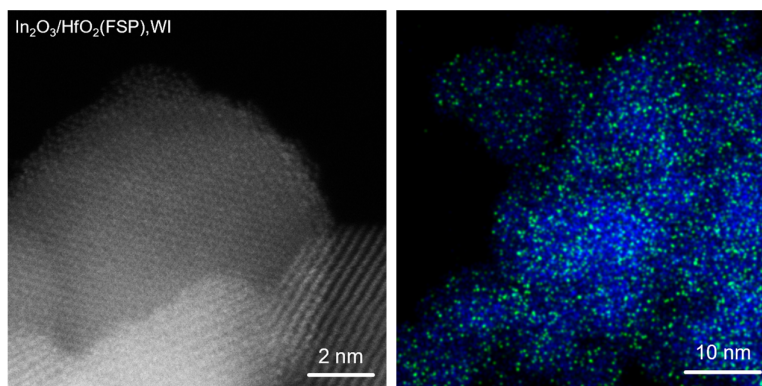

**Supplementary Fig. 21.** HAADF-STEM image (left) and corresponding elemental map (right) of  $\text{In}_2\text{O}_3/\text{HfO}_x(\text{FSP}), \text{WI}$  in fresh and equilibrated forms. Reaction conditions as described in **Supplementary Fig. 1**.

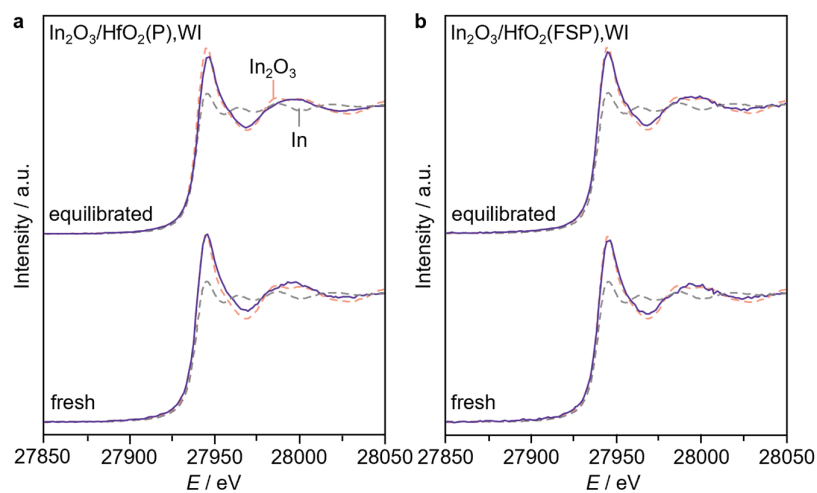

**Supplementary Fig. 22.** Ex-situ In  $K$ -edge XANES spectra of **a**,  $\text{In}_2\text{O}_3/\text{HfO}_2(\text{P}), \text{WI}$  and **b**,  $\text{In}_2\text{O}_3/\text{HfO}_2(\text{FSP}), \text{WI}$  catalysts in fresh and equilibrated forms. Reference spectra of bulk  $\text{In}_2\text{O}_3$  and In metal are shown with orange and grey dash lines, respectively. Reaction conditions as described in **Supplementary Fig. 1**.

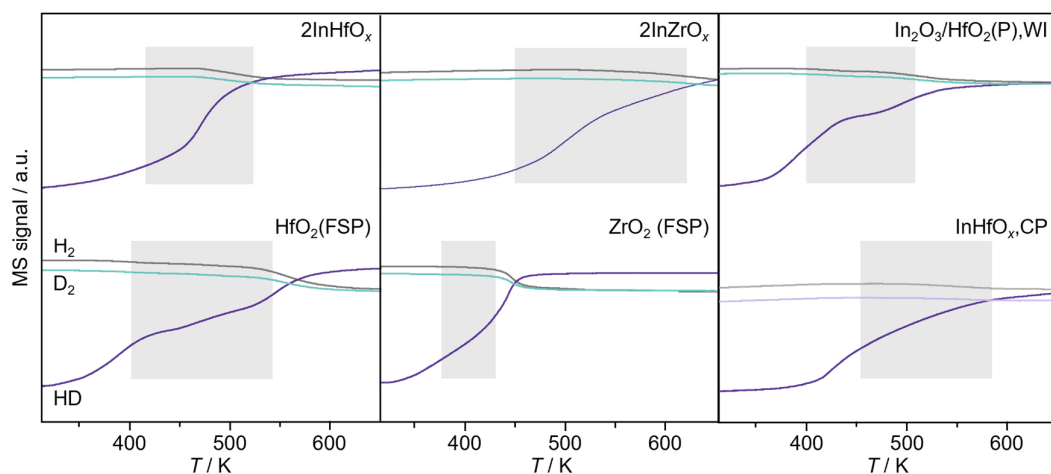

**Supplementary Fig. 23.** Temperature-programmed  $\text{H}_2$ - $\text{D}_2$  exchange profiles of selected catalysts. Shaded areas indicate temperature ranges where isotopic exchange occurs. Corresponding profiles of the bare supports are shown for comparison.

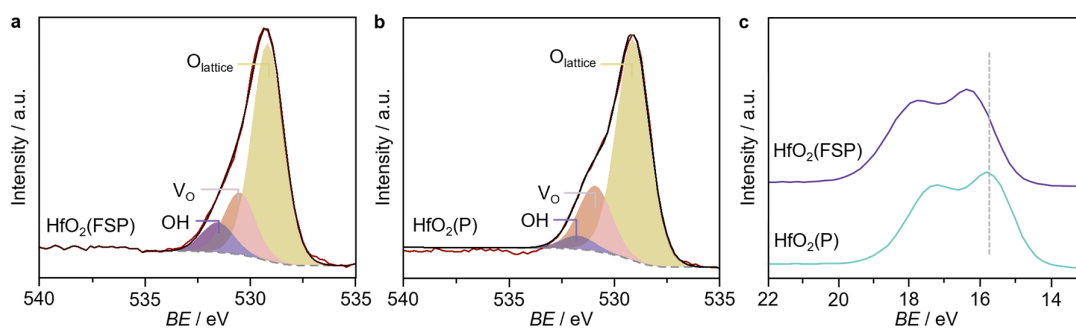

**Supplementary Fig. 24.** XPS O 1s core-level spectra for **a**,  $\text{HfO}_2(\text{FSP})$  and **b**,  $\text{HfO}_2(\text{P})$  highlighting differences in oxygen coordination environments. **c**, XPS Hf 4f core-level spectra of both samples.

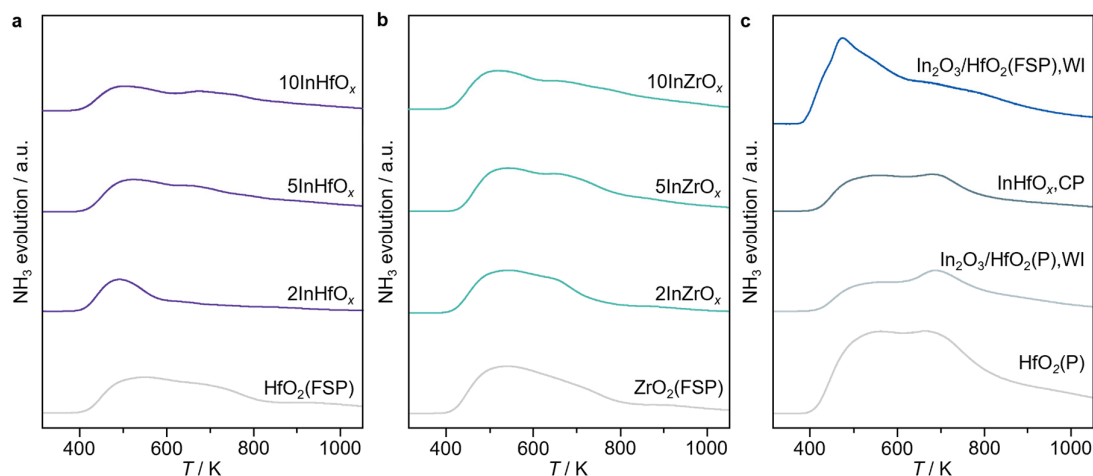

**Supplementary Fig. 25.**  $\text{NH}_3$ -TPD profiles of **a**,  $\text{InHfO}_x$  catalysts, and reference **b**,  $\text{InZrO}_x$  catalysts, and **c**,  $\text{HfO}_2$ -supported systems. The profiles of the pure supports are shown for reference.

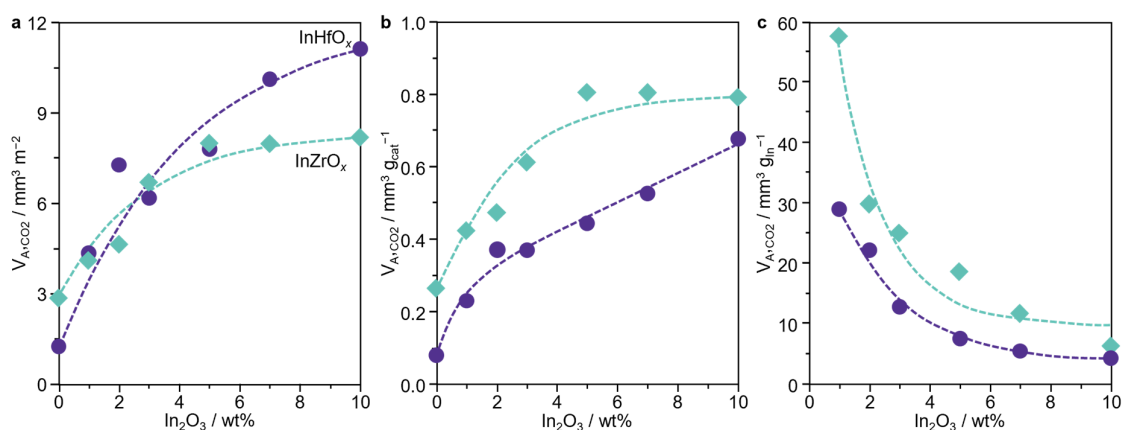

**Supplementary Fig. 26.** Volumetric  $\text{CO}_2$  uptake of  $\text{InHfO}_x$  and  $\text{InZrO}_x$  catalysts normalized by **a**, specific surface area, **b**, catalyst mass, and **c**, indium content.

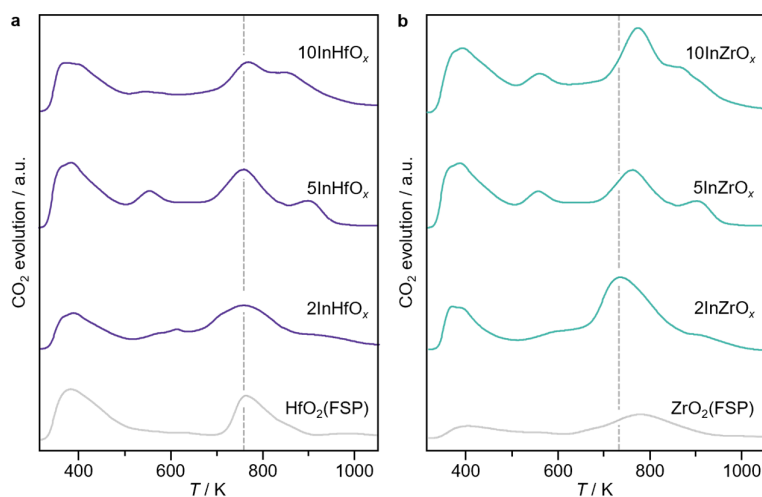

**Supplementary Fig. 27.** CO<sub>2</sub>-TPD profiles of **a**, InHfO<sub>x</sub> and **b**, InZrO<sub>x</sub> catalysts. Grey lines show the profiles of the corresponding pure support. Vertical dashed lines mark the change of the position of high-temperature desorption peaks.



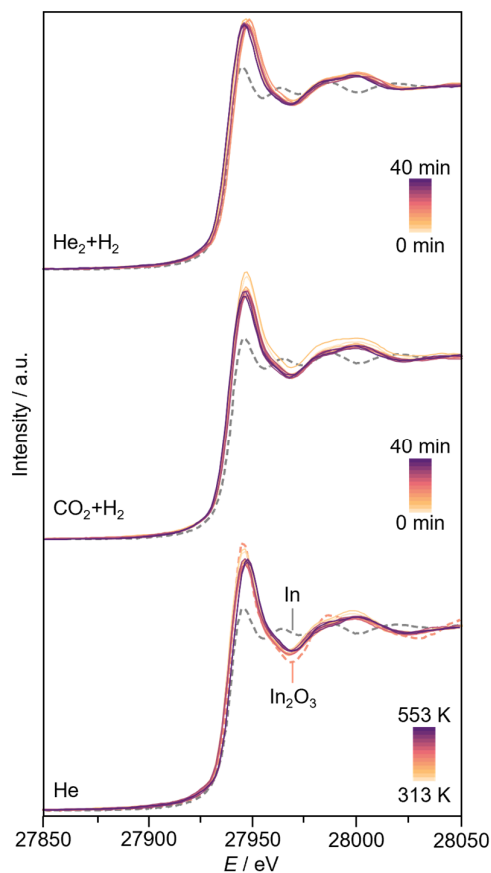

**Supplementary Fig. 28.** Operando In *K*-edge XANES spectra of  $2\text{InZrO}_x$  ( $m_{\text{cat}} = 0.013$  g) during heating in He (rate =  $5 \text{ K min}^{-1}$ ,  $F_{\text{T}} = 20 \text{ cm}^3 \text{ min}^{-1}$ ,  $T = 553 \text{ K}$ ,  $P = 15 \text{ bar}$ , dwell time = 60 min), under  $\text{CO}_2 + \text{H}_2$  ( $F_{\text{T}} = 20 \text{ cm}^3 \text{ min}^{-1}$ ,  $T = 553 \text{ K}$ ,  $P = 15 \text{ bar}$ ,  $\text{H}_2/\text{CO}_2 = 4$ , dwell time = 60 min), and under  $\text{He} + \text{H}_2$  ( $F_{\text{T}} = 20 \text{ cm}^3 \text{ min}^{-1}$ ,  $T = 553 \text{ K}$ ,  $P = 15 \text{ bar}$ ,  $\text{H}_2/\text{He} = 4$ , dwell time = 60 min).



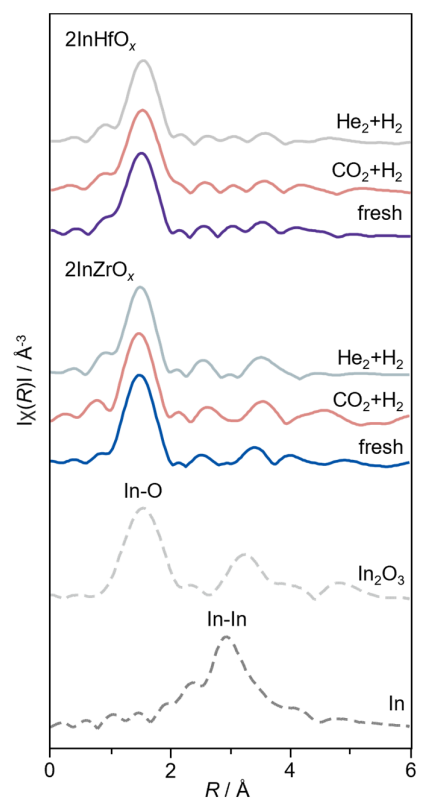

**Supplementary Fig. 29.** Operando In *K*-edge EXAFS spectra of  $2\text{InHfO}_x$  and  $2\text{InZrO}_x$  in fresh form and during treatment in  $\text{CO}_2+\text{H}_2$  or  $\text{He}+\text{H}_2$  mixtures. The spectra of bulk In and  $\text{In}_2\text{O}_3$  are shown for reference.

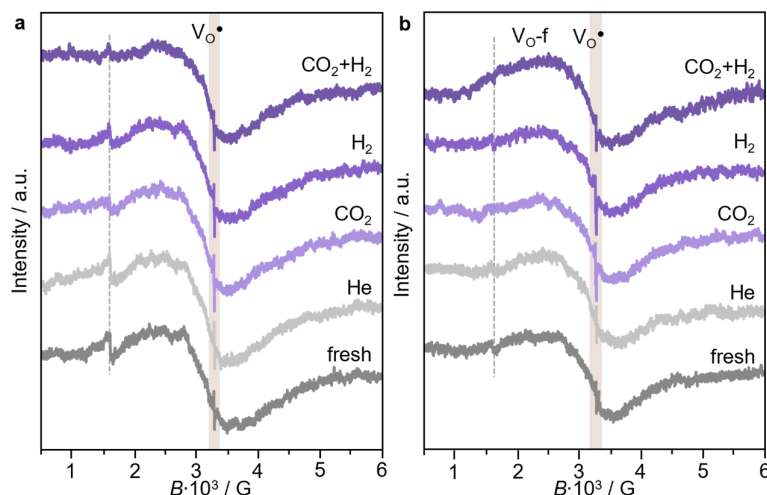

**Supplementary Fig. 30. a,b**, Full in-situ EPR spectra for 2InHfO<sub>x</sub> (a) and 2InZrO<sub>x</sub> (b) catalysts, recorded at room temperature and during heating in He ( $F_T = 210 \text{ cm}^3 \text{ min}^{-1}$ , heating rate =  $50 \text{ K min}^{-1}$ ,  $T = 553 \text{ K}$ ,  $P = 10 \text{ bar}$ ), after reducing in H<sub>2</sub> ( $F_T = 210 \text{ cm}^3 \text{ min}^{-1}$ ,  $T = 553 \text{ K}$ ,  $P = 10 \text{ bar}$ ), after exposing to CO<sub>2</sub> ( $F_T = 110 \text{ cm}^3 \text{ min}^{-1}$ ,  $T = 553 \text{ K}$ ,  $P = 10 \text{ bar}$ ), and after CO<sub>2</sub> hydrogenation ( $F_T = 200 \text{ cm}^3 \text{ min}^{-1}$ ,  $T = 553 \text{ K}$ ,  $P = 10 \text{ bar}$ ,  $\text{H}_2/\text{CO}_2 = 4$ ). The broad signal, attributed to unpaired electrons delocalized over several oxygen vacancies that interact (exchange-coupled vacancy polarons, V<sub>O</sub>-f), varies under distinct conditions for 2InZrO<sub>x</sub>, being most prominent under CO<sub>2</sub>+H<sub>2</sub>. The dashed lines indicate the linewidth of V<sub>O</sub>-f in the fresh catalysts.

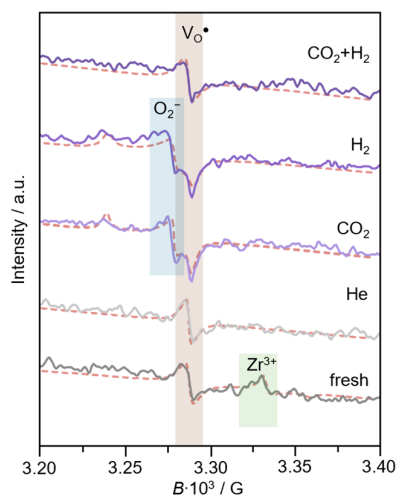

**Supplementary Fig. 31.** Zoomed-in spectrum of 2InZrO<sub>x</sub> showing reduced  $\text{Zr}^{3+}$  species in the fresh state and the emergence of superoxide ( $\text{O}_2^{\cdot-}$ ) signals under reaction and reducing conditions. The dash lines denote the fitted results using particle swarm optimization method.

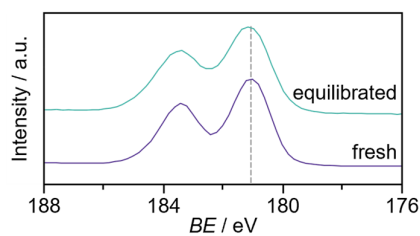

**Supplementary Fig. 32.** XPS Zr 3d core-level spectra of the 2InZrO<sub>x</sub> catalyst in fresh and equilibrated forms. Reaction conditions as described in **Supplementary Fig. 1**.

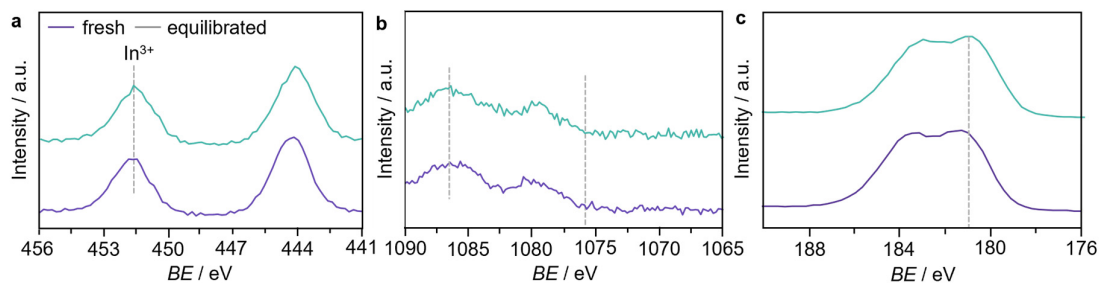

**Supplementary Fig. 33.** **a**, In 3*d* and **b**, In MNN XPS spectra of fresh and equilibrated 5InHfO<sub>x</sub> catalysts. **c**, Hf 4*f* XPS core-level spectra of 5InHfO<sub>x</sub> catalyst.

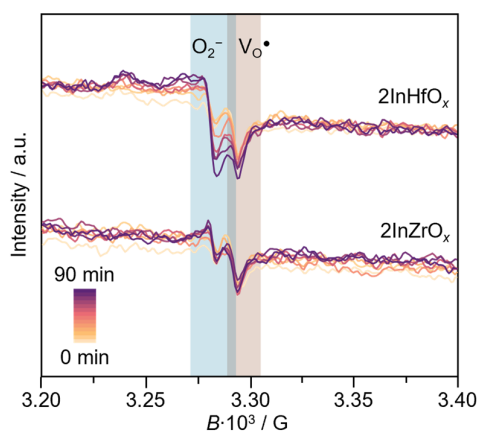

**Supplementary Fig. 34.** Paramagnetic signals from EPR spectroscopy of 2InHfO<sub>x</sub> and 2InZrO<sub>x</sub> catalysts following in-situ measurement and exposure to air. Highlighted regions indicate superoxide (O<sub>2</sub><sup>•−</sup>) signals, evidencing the presence of surface electrons, with a stronger signal for 2InHfO<sub>x</sub>.

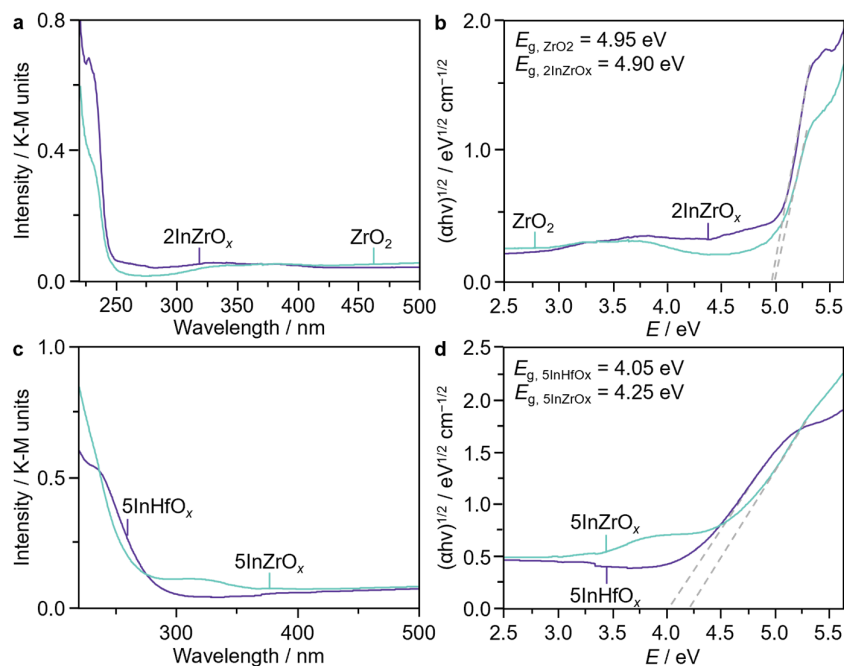

**Supplementary Fig. 35.** DR-UV-vis spectra of **a**,  $\text{ZrO}_2$  and  $2\text{InZrO}_x$  catalyst and **b**,  $5\text{InHfO}_x$  and  $5\text{InZrO}_x$  catalysts. **c,d**, Corresponding Tauc plots for bandgap determination.

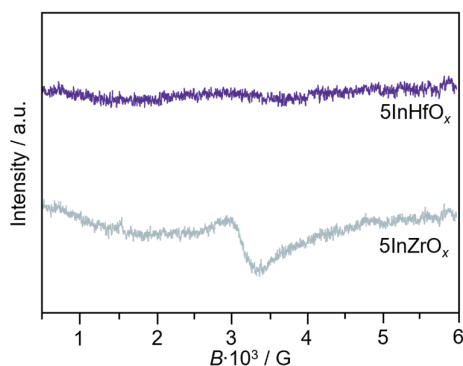

**Supplementary Fig. 36.** Ex-situ EPR spectra of  $5\text{InHfO}_x$  and  $5\text{InZrO}_x$  catalysts. Broad ferromagnetic signals in  $5\text{InZrO}_x$  arise from electron hopping between oxygen vacancies and Zr  $3d$  orbitals. For  $5\text{InHfO}_x$ , these signals are further broadened and suppressed since the energy level of oxygen vacancies overlaps with the conduction band, allowing electron transitions to Hf  $4f$  orbitals, indicative of greater electronic coupling.

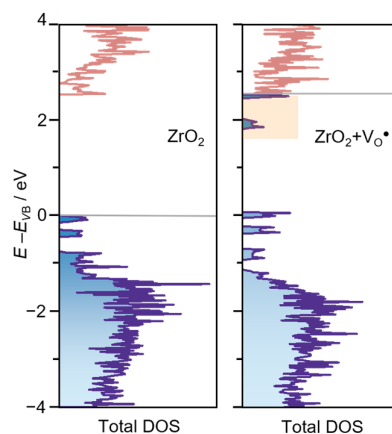

**Supplementary Fig. 37.** Density of states (DOS) for pristine m-ZrO<sub>2</sub> and m-ZrO<sub>2</sub> with one vacancy. The DOS are aligned with respect to the valence band of the pristine system. The valence band is marked in grey, with the states arising from excess electrons highlighted with red dotted circles. Upon oxygen vacancy formation, electronic states appear in the band gap and near the conduction band, which are associated with the formation of a Zr<sup>3+</sup> and one electron stored in the oxygen vacancy, respectively.

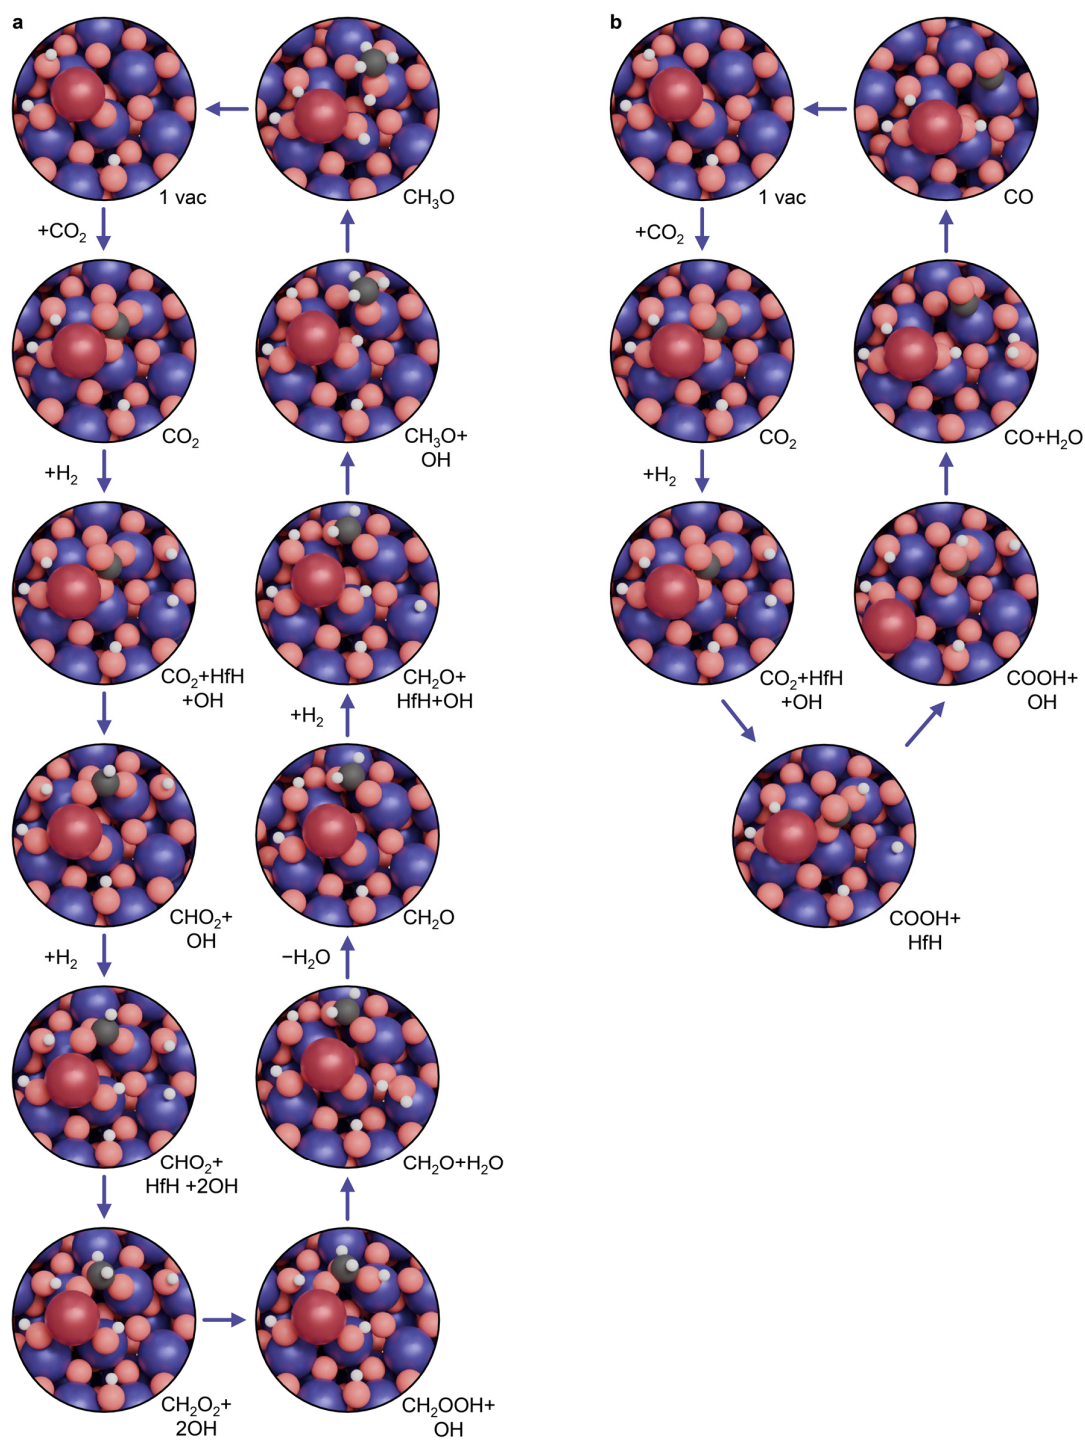

**Supplementary Fig. 38.** Simulated intermediates for  $\text{CO}_2$  conversion to **a**, methanol and **b**, CO over  $\text{In}(\text{OH})_3\text{-m-HfO}_2$  containing one vacancy. Colour code: Hf - purple; In - red; O - salmon pink; C - dark-grey; H - white.

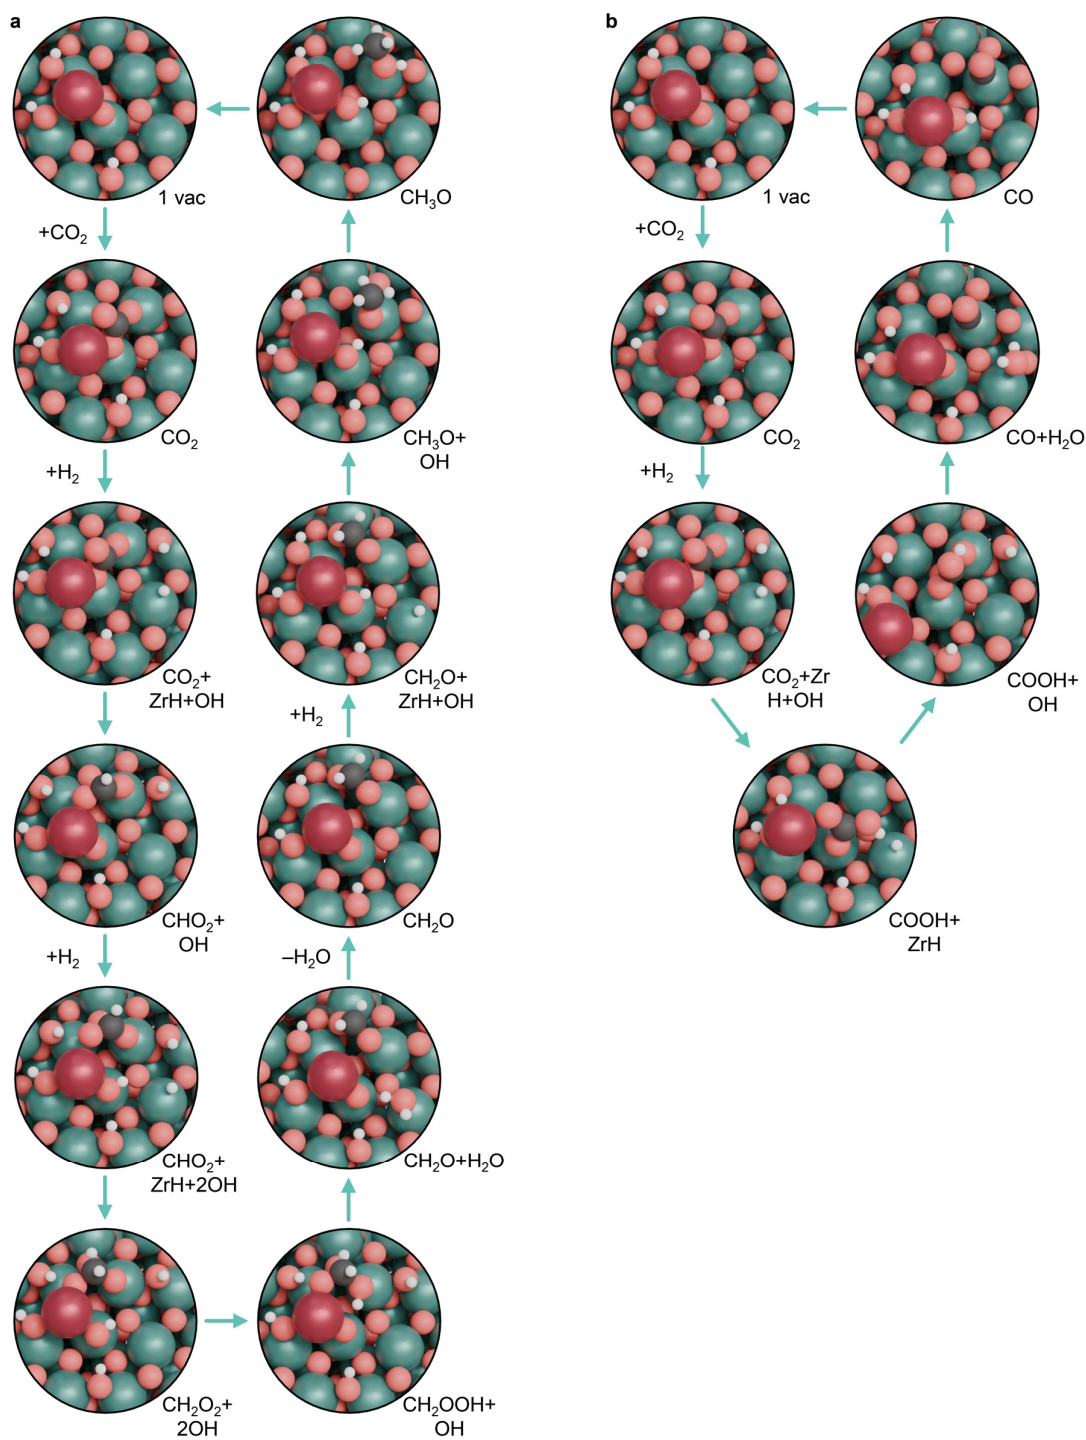

**Supplementary Fig. 39.** Simulated intermediates for CO<sub>2</sub> conversion to **a**, methanol and **b**, CO over In(OH)<sub>3</sub>/m-ZrO<sub>2</sub> containing one vacancy. Colour code: Hf - purple; In - red; O - salmon pink; C - dark grey; H - white.



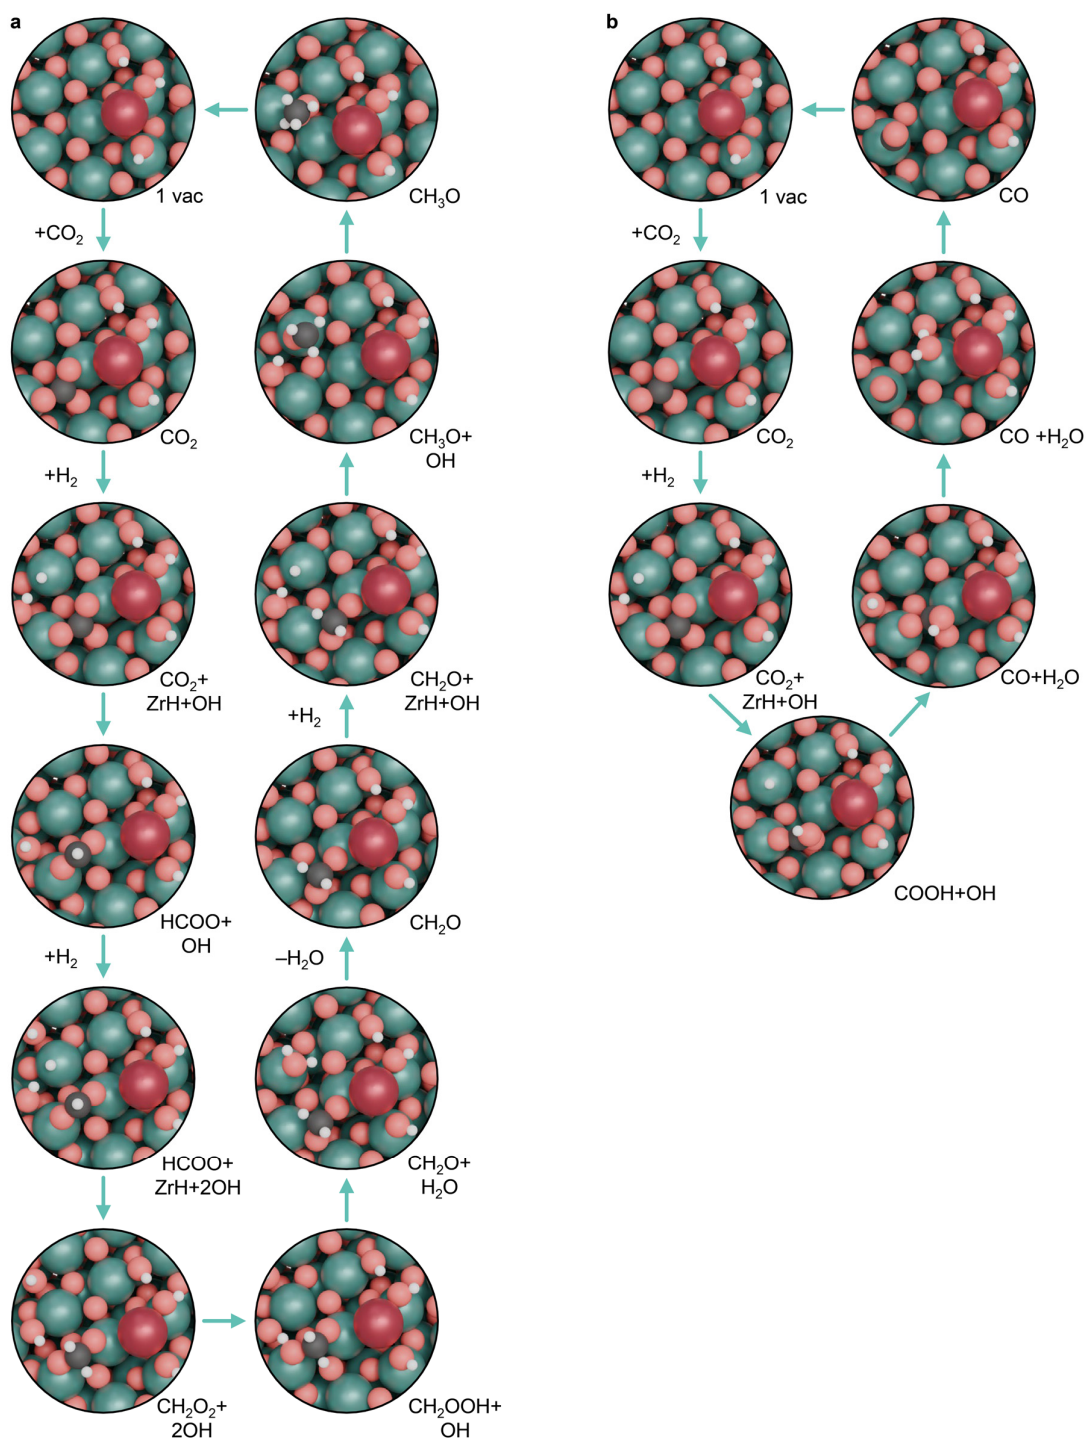

**Supplementary Fig. 40.** Simulated intermediates for  $\text{CO}_2$  conversion to **a**, methanol and **b**, CO over  $\text{In}(\text{OH})_3/\text{t-ZrO}_2$  containing one vacancy. Colour code: Hf - purple; In - red; O - salmon pink; C - dark grey; H - white.

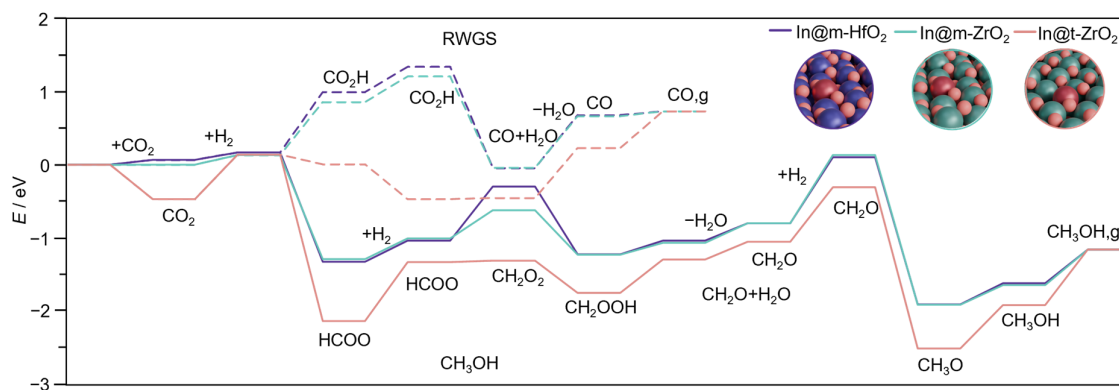

**Supplementary Fig. 41.** Thermodynamics of reaction paths for CO<sub>2</sub> hydrogenation to methanol (solid lines) and the competing RWGS reactions (dashed line), on m-HfO<sub>2</sub>, m-ZrO<sub>2</sub>, and t-HfO<sub>2</sub> models containing an incorporated In atom and one oxygen vacancy.

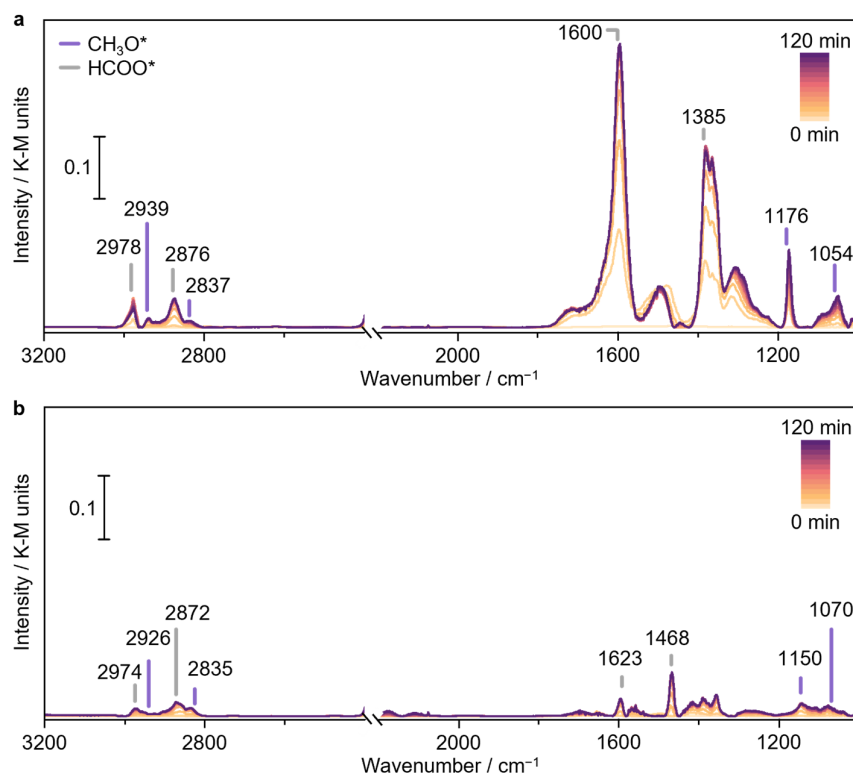

**Supplementary Fig. 42.** In-situ DRIFT spectra of **a**, 2InHfO<sub>x</sub> and **b**, 2InZrO<sub>x</sub> under CO<sub>2</sub> hydrogenation conditions ( $F_T = 20 \text{ cm}^3 \text{ min}^{-1}$ ,  $T = 553 \text{ K}$ ,  $P = 20 \text{ bar}$ ,  $\text{H}_2/\text{CO}_2 = 4$ , dwell time = 120 min).

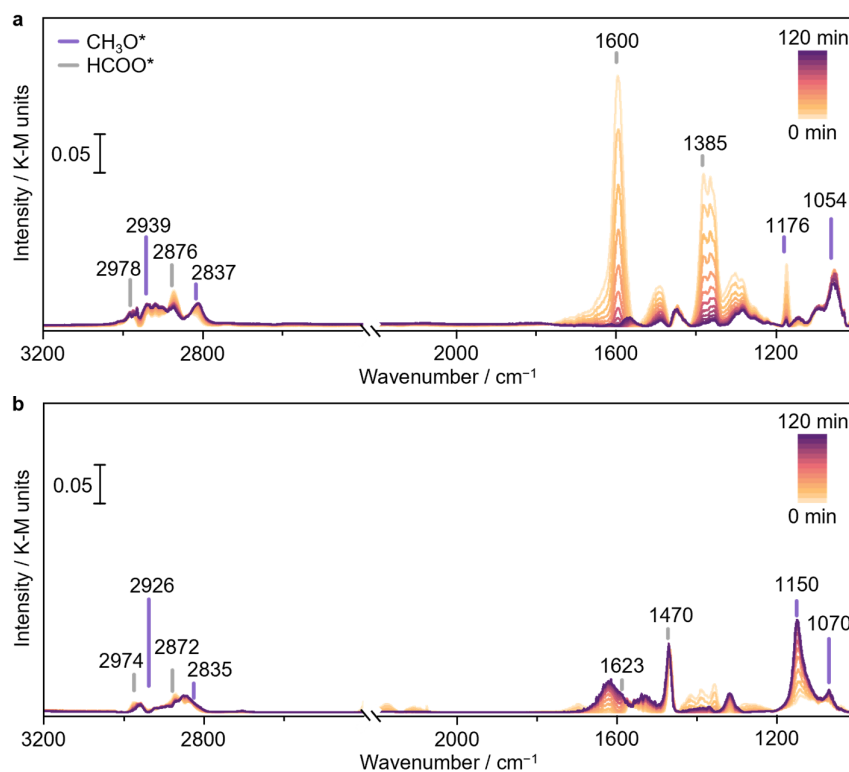

**Supplementary Fig. 43.** In-situ DRIFT spectra of **a**,  $2\text{InHfO}_x$  and **b**,  $2\text{InZrO}_x$  after switching to  $\text{H}_2$  balanced with He ( $F_T = 20 \text{ cm}^3 \text{ min}^{-1}$ ,  $T = 553 \text{ K}$ ,  $P = 20 \text{ bar}$ ,  $\text{H}_2/\text{He} = 4$ , dwell time = 120 min).

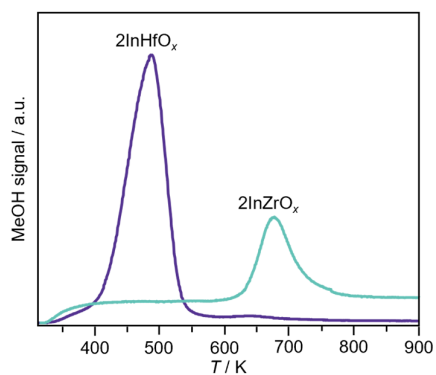

**Supplementary Fig. 44.** MeOH-TPD profiles of fresh  $2\text{InHfO}_x$  and  $2\text{InZrO}_x$  catalysts.

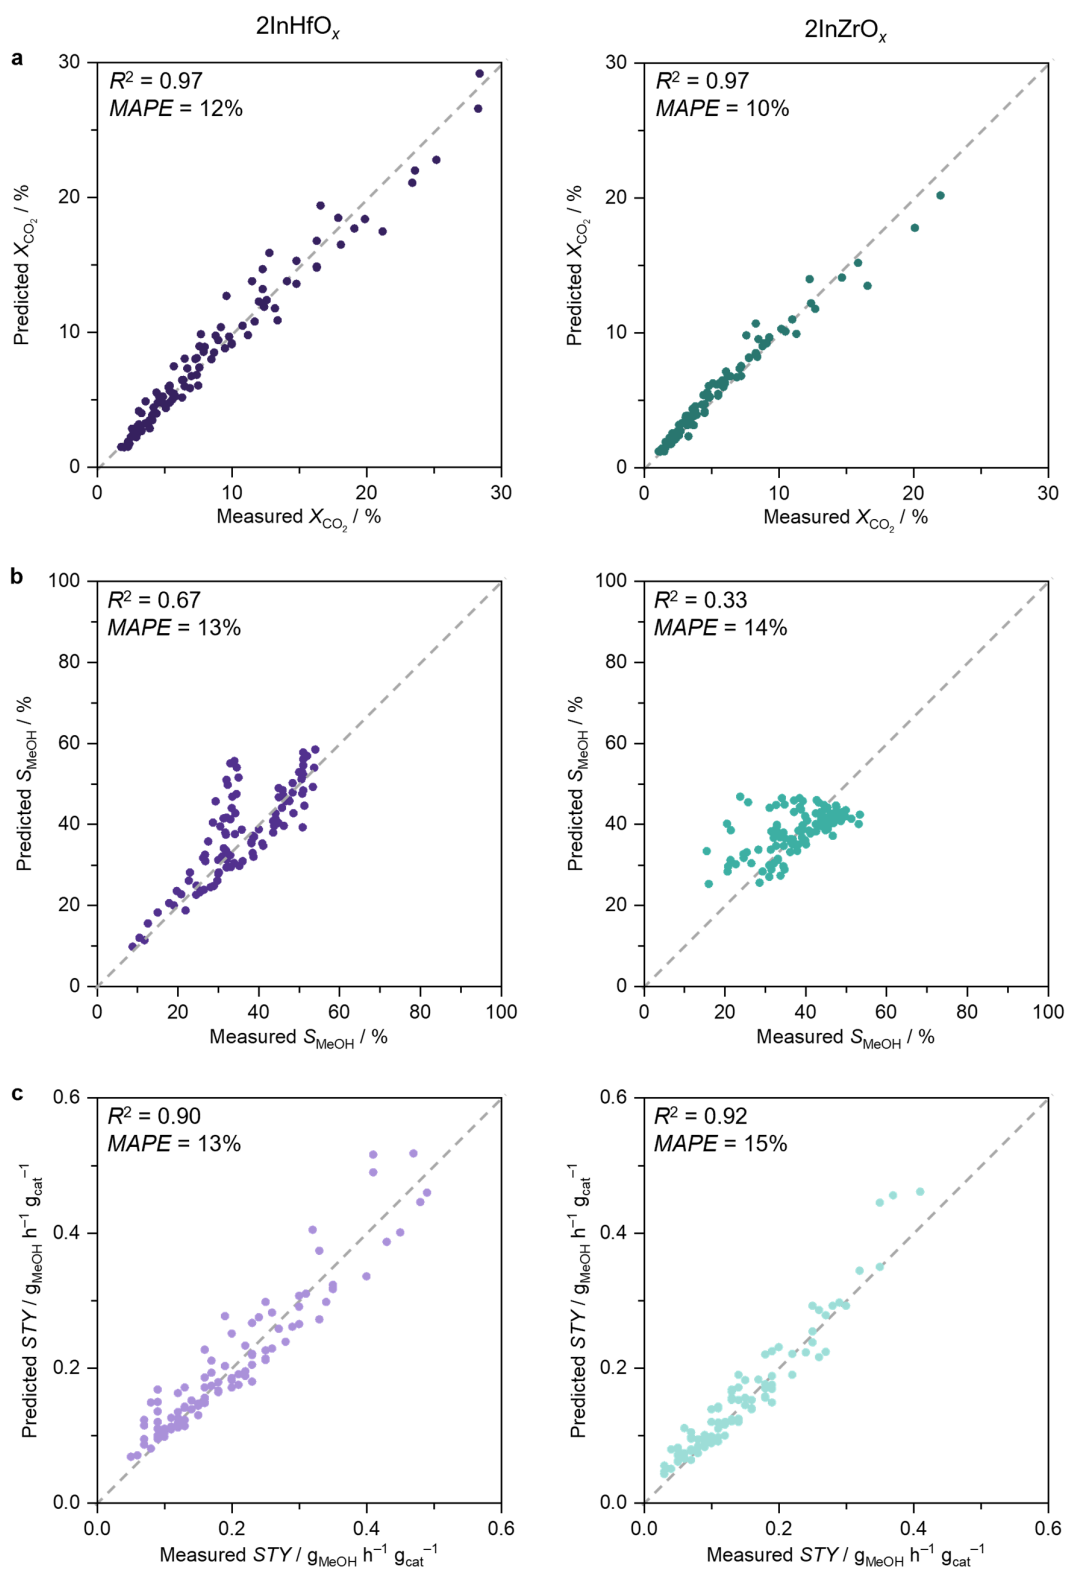

**Supplementary Fig. 45.** Parity plots comparing **a**,  $X_{\text{CO}_2}$ , **b**,  $S_{\text{MeOH}}$ , **c**,  $STY$  during  $\text{CO}_2$  hydrogenation over  $2\text{InHfO}_x$  (left) and  $2\text{InZrO}_x$  (right) predicted by the two-site LHHW kinetic model (**Supplementary Table 9**) versus experimental data. Mean absolute percentage errors

(*MAPE*) and coefficients of determination ( $R^2$ ) are provided for each metric. Dashed lines indicate the identity line ( $x = y$ ).

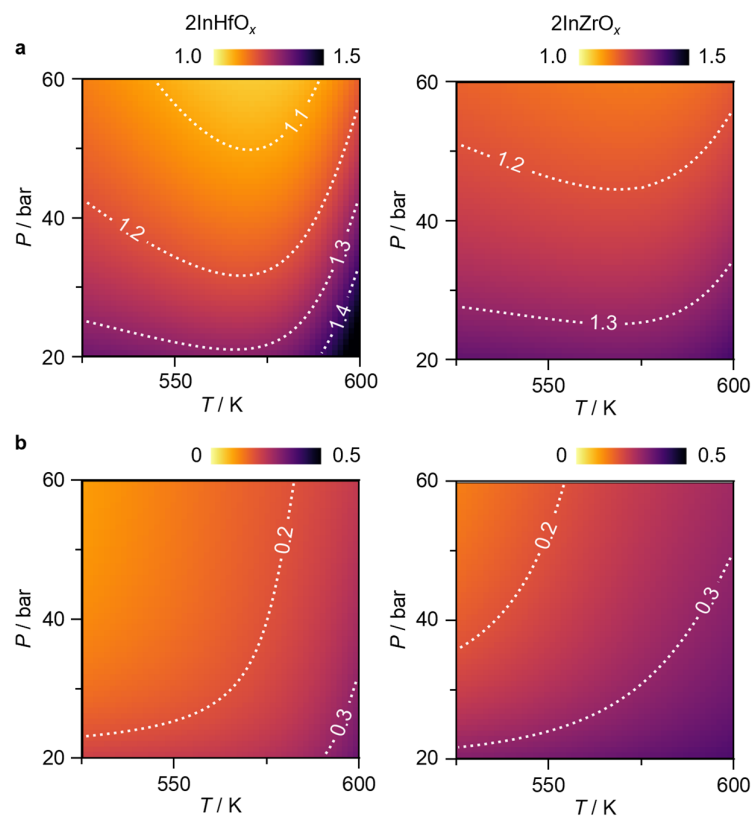

**Supplementary Fig. 46.** Apparent reaction orders with respect to **a**, H<sub>2</sub> and **b**, CO<sub>2</sub> for methanol formation as a function of T and P at  $GHSV = 24,000 \text{ cm}^3 \text{ h}^{-1} \text{ g}_{\text{cat}}^{-1}$ , for 2InHfO<sub>x</sub> and 2InZrO<sub>x</sub> as calculated by the kinetic model.

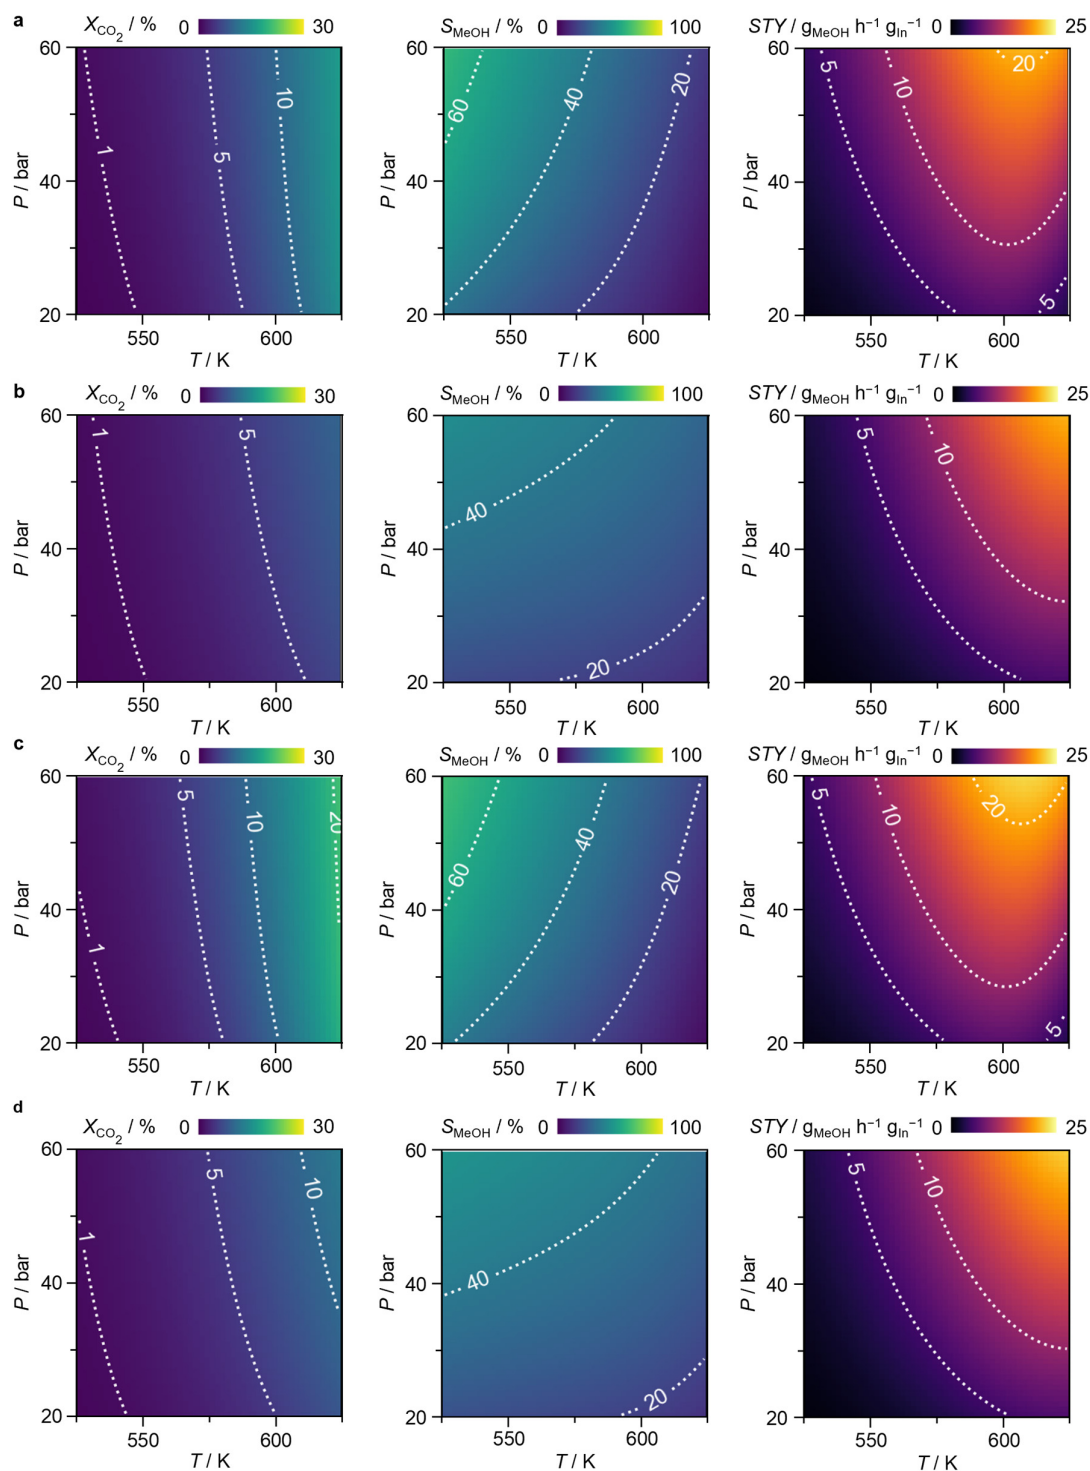

**Supplementary Fig. 47.** Kinetic model prediction of  $X_{\text{CO}_2}$ ,  $S_{\text{MeOH}}$ , and methanol  $STY$  during  $\text{CO}_2$  hydrogenation over at **a,b**  $\text{H}_2/\text{CO}_2 = 2$  and **c,d**  $\text{H}_2/\text{CO}_2 = 3$  over  $2\text{InHfO}_x$  (**a,c**) and  $2\text{InZrO}_x$  (**b,d**) catalysts as a function of  $P$  and  $T$  at  $GHSV = 24,000 \text{ cm}^3 \text{ h}^{-1} \text{ g}_{\text{cat}}^{-1}$ .

## References

1. Shin, H. et al. Zirconia and hafnia polymorphs: Ground-state structural properties from diffusion Monte Carlo. *Phys. Rev. Mater.* **2**, 075001 (2018).
2. Mukhopadhyay, A. B., Sanz, J. F. & Musgrave, C. B. First-principles investigation of hydroxylated monoclinic HfO<sub>2</sub> surfaces. *Chem. Mater.* **18**, 3397-3403 (2006).
3. Christensen, A. & Carter, E. A. First-principles study of the surfaces of zirconia. *Phys. Rev. B* **58**, 8050-8064 (1998).
4. Ricca, C., Ringuedé, A., Cassir, M., Adamo, C. & Labat, F. A comprehensive DFT investigation of bulk and low-index surfaces of ZrO<sub>2</sub> polymorphs. *J. Comput. Chem.* **36**, 9-21 (2015).
5. Araújo, T. P. et al. Flame-made ternary Pd-In<sub>2</sub>O<sub>3</sub>-ZrO<sub>2</sub> catalyst with enhanced oxygen vacancy generation for CO<sub>2</sub> hydrogenation to methanol. *Nat. Commun.* **13**, 5610 (2022).
6. Zou, T. et al. Descriptors of InZrO<sub>x</sub> vs ZnZrO<sub>x</sub> catalysts for CO<sub>2</sub> hydrogenation to methanol. *Adv. Energy Mater.* **15**, 2404967 (2025).
7. Araújo, T. P. et al. Design of flame-made ZnZrO<sub>x</sub> catalysts for sustainable methanol synthesis from CO<sub>2</sub>. *Adv. Energy Mater.* **13**, 2204122 (2023).
8. Zou, T. et al. Design of technical ZnO/ZrO<sub>2</sub> catalysts for CO<sub>2</sub> hydrogenation to green methanol. *J. Catal.* **430**, 115344 (2024).
9. Jain, A. et al. Commentary: the Materials Project: A materials genome approach to accelerating materials innovation. *APL Mater.* **1**, 011002 (2013).
